# Supplementary material for: Activating natural product synthesis using CRISPR interference and activation systems in Streptomyces
Source: bioRxiv or medRxiv preprint supplement (doi:10.1101/2021.10.28.466254), 2021-10-28
Supplement: Supplementary file [file media-1.pdf]

## Activating natural product synthesis using CRISPR interference and activation systems in *Streptomyces*.

Andrea Ameruoso<sup>1</sup>, Maria Claudia Villegas Kcam<sup>1</sup>, Katherine Piper Cohen<sup>1</sup> and James Chappell<sup>1,2</sup>

1 - Department of BioSciences, Rice University, 6100 Main Street, MS 140, Houston, TX 77005, USA.

2 - Department of Bioengineering, Rice University, 6100 Main Street, MS 142, Houston, TX 77005, USA.

### TABLE OF CONTENTS

|                    |                                                                                                                                         |
|--------------------|-----------------------------------------------------------------------------------------------------------------------------------------|
| <b>Pages 1-4</b>   | Supplementary table 1. List of plasmids used in this study                                                                              |
| <b>Pages 5-15</b>  | Supplementary table 2. Example DNA plasmid sequences                                                                                    |
| <b>Page 16</b>     | Supplementary table 3. Promoters used in this study                                                                                     |
| <b>Pages 16-17</b> | Supplementary table 4. sgRNA sequences used in this study                                                                               |
| <b>Pages 18-19</b> | Supplementary table 5. Activator domains (ADs) used in this study                                                                       |
| <b>Page 20</b>     | Supplementary figure 1. Evaluating the strength of a library of <i>Streptomyces</i> promoters                                           |
| <b>Page 21</b>     | Supplementary figure 2. CRISPRi results in decreased fluorescence in the absence of a sgRNA or in the presence of a non-targeting sgRNA |
| <b>Page 22</b>     | Supplementary figure 3. CRISPRi results in inhibition of growth in the absence of a sgRNA or in the presence of a non-targeting sgRNA   |
| <b>Page 23</b>     | Supplementary figure 4. Evaluating distance-dependent activation patterns of CRISPRa                                                    |
| <b>Page 24</b>     | Supplementary figure 5. Activating production of jadomycin B using CRISPRi                                                              |
| <b>Page 25</b>     | Supplementary figure 6. Activating production of jadomycin B using CRISPRa                                                              |
| <b>Page 26</b>     | References                                                                                                                              |

**Supplementary table 1. List of all plasmids used in this study.** Abbreviations are as follows: R9 = R9 ribosome binding site, ori = origin of replication, specR = spectinomycin resistance gene, apmR = apramycin resistance gene, oriT = origin of transfer, sgRNA = single guide RNA, ds origin = double-stranded origin, bp = base pairs, NT = non-template strand, T = template strand,  $\alpha$ NTD = N-terminal domain of the  $\alpha$  subunit of RNAP. Promoters: KasO\**p*, ermE\**p*, gapdh(EL), rpsL(XC), 57, SP43, SP30, SP20, SP10, SP1. Terminators: T7,  $\lambda$ t0, Fd. Origins of replication: pMB1, pUC.

| Plasmid ID | Plasmid features                                                                                                                                                                    | Name                           | Figure(s)                              |
|------------|-------------------------------------------------------------------------------------------------------------------------------------------------------------------------------------|--------------------------------|----------------------------------------|
| pJEC532    | KasO* <i>p</i> - mCherry - T7 - pMB1 ori - SpecR - RP4 oriT - $\Phi$ C31 attP site - $\Phi$ C31 integrase                                                                           | mCherry reporter               | 1b, 1c, 1d, S1                         |
| pJEC533    | gapdh(EL) - mCherry - T7 terminator - pMB1 ori - SpecR - RP4 oriT - $\Phi$ C31 attP site - $\Phi$ C31 integrase                                                                     | gapdh(EL)-mCherry              | S1                                     |
| pJEC710    | Fd terminator - gapdh(EL) - lacZ - sgRNA scaffold - $\lambda$ t0 terminator - pUC ori - ApmR - pSG5 replicase - pSG5 ds origin - RP4 oriT                                           | no CRISPR                      | 1b, 1c, 1d, 2b, 2c, 3d, 3e, S1, S2, S3 |
| pJEC711    | rpsL(XC) - dCas9 - Fd terminator - gapdh(EL) - mCherry sgRNA (+11bp) - sgRNA scaffold - $\lambda$ t0 terminator - pUC ori - ApmR - pSG5 replicase - pSG5 ds origin - RP4 oriT       | rpsL(XC)-dCas9/gapdh(EL)-sgRNA | 1b                                     |
| pJEC712    | rpsL(XC) - dCas9 - Fd terminator - SP43 - mCherry sgRNA (+11bp) - sgRNA scaffold - $\lambda$ t0 terminator - pUC ori - ApmR - pSG5 replicase - pSG5 ds origin - RP4 oriT            | rpsL(XC)-dCas9/SP43-sgRNA      | 1b, 1c                                 |
| pJEC713    | SP1 - RiboJ - R9 - dCas9 - Fd terminator - SP43 - mCherry sgRNA (+11bp) - sgRNA scaffold - $\lambda$ t0 terminator - pUC ori - ApmR - pSG5 replicase - pSG5 ds origin - RP4 oriT    | SP1-dCas9/SP43-sgRNA           | 1c                                     |
| pJEC714    | SP30 - RiboJ -R9 - dCas9 - Fd terminator - SP43 - mCherry sgRNA (+11bp NT) - sgRNA scaffold - $\lambda$ t0 terminator - pUC ori - ApmR - pSG5 replicase - pSG5 ds origin - RP4 oriT | SP30-dCas9/SP43-sgRNA (+11 NT) | 1c, 1d, S2                             |
| pJEC715    | SP43 - RiboJ -R9 - mCherry - T7 terminator - pMB1 ori - SpecR - RP4 oriT - $\Phi$ C31 attP site - $\Phi$ C31 integrase                                                              | SP43-mCherry                   | S1                                     |
| pJEC716    | SP30 - RiboJ -R9 - mCherry - T7 terminator - pMB1 ori - SpecR - RP4 oriT - $\Phi$ C31 attP site - $\Phi$ C31 integrase                                                              | SP30-mCherry                   | S1                                     |
| pJEC717    | ermE* <i>p</i> - mCherry - T7 terminator - pMB1 ori - SpecR - RP4 oriT - $\Phi$ C31 attP site - $\Phi$ C31 integrase                                                                | ermE* <i>p</i> -mCherry        | S1                                     |
| pJEC718    | SP20 - RiboJ -R9 - mCherry - T7 terminator - pMB1 ori - SpecR - RP4 oriT - $\Phi$ C31 attP site - $\Phi$ C31 integrase                                                              | SP20-mCherry                   | S1                                     |
| pJEC719    | SP10 - RiboJ -R9 - mCherry - T7 terminator - pMB1 ori - SpecR - RP4 oriT - $\Phi$ C31 attP site - $\Phi$ C31 integrase                                                              | SP10-mCherry                   | 2b, 2c, S1                             |

|         |                                                                                                                                                                                      |                                                        |       |
|---------|--------------------------------------------------------------------------------------------------------------------------------------------------------------------------------------|--------------------------------------------------------|-------|
| pJEC720 | rpsL(XC) - mCherry - T7 terminator - pMB1 ori - SpecR - RP4 oriT - ΦC31 attP site - ΦC31 integrase                                                                                   | rpsL(XC)-mCherry                                       | S1    |
| pJEC721 | 57 - mCherry - T7 terminator - pMB1 ori - SpecR - RP4 oriT - ΦC31 attP site - ΦC31 integrase                                                                                         | 57-mCherry                                             | S1    |
| pJEC722 | SP1 - RiboJ -R9 - mCherry - T7 terminator - pMB1 ori - SpecR - RP4 oriT - ΦC31 attP site - ΦC31 integrase                                                                            | SP1-mCherry                                            | S1    |
| pJEC723 | SP30 - RiboJ -R9 - dCas9 - Fd terminator - SP43 - non-coding genomic region sgRNA #1 - sgRNA scaffold - λt0 terminator - pUC ori - ApmR - pSG5 replicase - pSG5 ds origin - RP4 oriT | CRISPRi with sgRNA binding to a genomic region         | 1d,S2 |
| pJEC724 | SP30 - RiboJ -R9 - dCas9 - Fd terminator - SP43 - non-coding genomic region sgRNA #2 - sgRNA scaffold - λt0 terminator - pUC ori - ApmR - pSG5 replicase - pSG5 ds origin - RP4 oriT | CRISPRi with sgRNA binding to a genomic region         | S2    |
| pJEC725 | SP30 - RiboJ -R9 - dCas9 - Fd terminator - SP43 - no-match sgRNA #2 - sgRNA scaffold - λt0 terminator - pUC ori - ApmR - pSG5 replicase - pSG5 ds origin - RP4 oriT                  | SP30-dCas9/SP43-sgRNA off-target w/o binding site      | S2    |
| pJEC726 | SP30 - RiboJ -R9 - dCas9 - Fd terminator - SP43 - lacZ - sgRNA scaffold - λt0 terminator - pUC ori - ApmR - pSG5 replicase - pSG5 ds origin - RP4 oriT                               | SP30-dCas9/SP43-sgRNA scaffold (i.e. no sgRNA control) | S2    |
| pJEC727 | SP30 - RiboJ -R9 - dCas9 - Fd terminator - SP43 - mCherry sgRNA (+123bp NT) - sgRNA scaffold - λt0 terminator - pUC ori - ApmR - pSG5 replicase - pSG5 ds origin - RP4 oriT          | SP30-dCas9/SP43-sgRNA (+123 NT)                        | 1d    |
| pJEC728 | SP30 - RiboJ -R9 - dCas9 - Fd terminator - SP43 - mCherry sgRNA (+230bp NT) - sgRNA scaffold - λt0 terminator - pUC ori - ApmR - pSG5 replicase - pSG5 ds origin - RP4 oriT          | SP30-dCas9/SP43-sgRNA (+230 NT)                        | 1d    |
| pJEC729 | SP30 - RiboJ -R9 - dCas9 - Fd terminator - SP43 - mCherry sgRNA (+531bp NT) - sgRNA scaffold - λt0 terminator - pUC ori - ApmR - pSG5 replicase - pSG5 ds origin - RP4 oriT          | SP30-dCas9/SP43-sgRNA (+531 NT)                        | 1d    |
| pJEC730 | SP30 - RiboJ -R9 - dCas9 - Fd terminator - SP43 - mCherry sgRNA (+623bp NT) - sgRNA scaffold - λt0 terminator - pUC ori - ApmR - pSG5 replicase - pSG5 ds origin - RP4 oriT          | SP30-dCas9/SP43-sgRNA (+623 NT)                        | 1d    |
| pJEC731 | SP30 - RiboJ -R9 - dCas9 - Fd terminator - SP43 - mCherry sgRNA (+9bp T) - sgRNA scaffold - λt0 terminator - pUC ori - ApmR - pSG5 replicase - pSG5 ds origin - RP4 oriT             | SP30-dCas9/SP43-sgRNA (+9 T)                           | 1d    |

|         |                                                                                                                                                                                                                     |                                        |            |
|---------|---------------------------------------------------------------------------------------------------------------------------------------------------------------------------------------------------------------------|----------------------------------------|------------|
| pJEC732 | SP30 - RiboJ -R9 - dCas9 - Fd terminator - SP43 - mCherry sgRNA (+112bp T) - sgRNA scaffold - $\lambda$ t0 terminator - pUC ori - ApmR - pSG5 replicase - pSG5 ds origin - RP4 oriT                                 | SP30-dCas9/SP43-sgRNA (+112 T)         | 1d         |
| pJEC733 | SP30 - RiboJ -R9 - dCas9 - Fd terminator - SP43 - mCherry sgRNA (+223bp T) - sgRNA scaffold - $\lambda$ t0 terminator - pUC ori - ApmR - pSG5 replicase - pSG5 ds origin - RP4 oriT                                 | SP30-dCas9/SP43-sgRNA (+223 T)         | 1d         |
| pJEC734 | SP30 - RiboJ -R9 - dCas9 - Fd terminator - SP43 - mCherry sgRNA (+540bp T) - sgRNA scaffold - $\lambda$ t0 terminator - pUC ori - ApmR - pSG5 replicase - pSG5 ds origin - RP4 oriT                                 | SP30-dCas9/SP43-sgRNA (+540 T)         | 1d         |
| pJEC735 | SP30 - RiboJ -R9 - dCas9 - Fd terminator - SP43 - mCherry sgRNA (+627bp T) - sgRNA scaffold - $\lambda$ t0 terminator - pUC ori - ApmR - pSG5 replicase - pSG5 ds origin - RP4 oriT                                 | SP30-dCas9/SP43-sgRNA (+627 T)         | 1d         |
| pJEC736 | PAM region - SP10 - RiboJ -R9 - mCherry - T7 terminator - pMB1 ori - SpecR - RP4 oriT - $\Phi$ C31 attP site - $\Phi$ C31 integrase                                                                                 | CRISPRa reporter #1                    | 2b, 2c, S3 |
| pJEC737 | SP30 - RiboJ -R9 - dCas9 - XTEN - $\alpha$ NTD - Fd terminator - SP43 - non-coding genomic region sgRNA #1 - sgRNA scaffold - $\lambda$ t0 terminator - pUC ori - ApmR - pSG5 replicase - pSG5 ds origin - RP4 oriT | SP30-dCas9- $\alpha$ NTD/off-target    | 2b         |
| pJEC738 | SP30 - RiboJ -R9 - dCas9 - XTEN - $\alpha$ NTD - Fd terminator - SP43 - CRISPRa sgRNA (82bp T) - sgRNA scaffold - $\lambda$ t0 terminator - pUC ori - ApmR - pSG5 replicase - pSG5 ds origin - RP4 oriT             | SP30-dCas9- $\alpha$ NTD/sgRNA - 82 T  | 2b         |
| pJEC739 | SP30 - RiboJ -R9 - dCas9 - XTEN - $\alpha$ NTD - Fd terminator - SP43 - CRISPRa sgRNA (83bp NT) - sgRNA scaffold - $\lambda$ t0 terminator - pUC ori - ApmR - pSG5 replicase - pSG5 ds origin - RP4 oriT            | SP30-dCas9- $\alpha$ NTD/sgRNA - 83 NT | 2b, 2c, S3 |
| pJEC740 | SP30 - RiboJ -R9 - dCas9 - XTEN - $\omega$ - Fd terminator - SP43 - non-coding genomic region sgRNA #1 - sgRNA scaffold - $\lambda$ t0 terminator - pUC ori - ApmR - pSG5 replicase - pSG5 ds origin - RP4 oriT     | SP30-dCas9- $\omega$ /off-target       | 2b         |
| pJEC741 | SP30 - RiboJ -R9 - dCas9 - XTEN - $\omega$ - Fd terminator - SP43 - CRISPRa sgRNA (83bp NT) - sgRNA scaffold - $\lambda$ t0 terminator - pUC ori - ApmR - pSG5 replicase - pSG5 ds origin - RP4 oriT                | SP30-dCas9- $\omega$ /sgRNA -83 NT     | 2b         |
| pJEC742 | SP30 - RiboJ -R9 - dCas9 - XTEN - $\omega$ - Fd terminator - SP43 - CRISPRa sgRNA (82bp T) - sgRNA scaffold - $\lambda$ t0 terminator - pUC ori - ApmR - pSG5 replicase - pSG5 ds origin - RP4 oriT                 | SP30-dCas9- $\omega$ /sgRNA -82 T      | 2b         |

|         |                                                                                                                                                                                                                |                                           |        |
|---------|----------------------------------------------------------------------------------------------------------------------------------------------------------------------------------------------------------------|-------------------------------------------|--------|
| pJEC743 | SP30 - RiboJ -R9 - dCas9 - XTEN - RbpA - Fd terminator - SP43 - non-coding genomic region sgRNA #1 - sgRNA scaffold - $\lambda$ t0 terminator - pUC ori - ApmR - pSG5 replicase - pSG5 ds origin - RP4 oriT    | SP30-dCas9-RbpA/off-target                | 2b     |
| pJEC744 | SP30 - RiboJ -R9 - dCas9 - XTEN - RbpA - Fd terminator - SP43 - CRISPRa sgRNA (83bp NT) - sgRNA scaffold - $\lambda$ t0 terminator - pUC ori - ApmR - pSG5 replicase - pSG5 ds origin - RP4 oriT               | SP30-dCas9-RbpA/sgRNA - 83 NT             | 2b     |
| pJEC745 | SP30 - RiboJ -R9 - dCas9 - XTEN - RbpA - Fd terminator - SP43 - CRISPRa sgRNA (82bp T) - sgRNA scaffold - $\lambda$ t0 terminator - pUC ori - ApmR - pSG5 replicase - pSG5 ds origin - RP4 oriT                | SP30-dCas9-RbpA/sgRNA - 82 T              | 2b     |
| pJEC746 | PAM region + 5bp - SP10 - RiboJ -R9 - mCherry - T7 terminator - pMB1 ori - SpecR - RP4 oriT - $\Phi$ C31 attP site - $\Phi$ C31 integrase                                                                      | CRISPRa reporter #2 (PAMs shifted by 5bp) | 2c, S3 |
| pJEC747 | SP30 - RiboJ -R9 - dCas9 - XTEN - $\alpha$ NTD - Fd terminator - SP43 - CRISPRa sgRNA (73bp NT) - sgRNA scaffold - $\lambda$ t0 terminator - pUC ori - ApmR - pSG5 replicase - pSG5 ds origin - RP4 oriT       | SP30-dCas9- $\alpha$ NTD/sgRNA - 73 NT    | 2c, S3 |
| pJEC748 | SP30 - RiboJ -R9 - dCas9 - XTEN - $\alpha$ NTD - Fd terminator - SP43 - CRISPRa sgRNA (93bp NT) - sgRNA scaffold - $\lambda$ t0 terminator - pUC ori - ApmR - pSG5 replicase - pSG5 ds origin - RP4 oriT       | SP30-dCas9- $\alpha$ NTD/sgRNA - 93 NT    | 2c, S3 |
| pJEC749 | SP30 - RiboJ -R9 - dCas9 - Fd terminator - SP43 - CRISPRi jadR2 sgRNA (+44bp NT) - sgRNA scaffold - $\lambda$ t0 terminator - pUC ori - ApmR - pSG5 replicase - pSG5 ds origin - RP4 oriT                      | jadR2 CRISPRi                             | 3d     |
| pJEC750 | SP30 - RiboJ -R9 - dCas9 - XTEN - $\alpha$ NTD - Fd terminator - SP43 - CRISPRa jadJ sgRNA (-73bp NT) - sgRNA scaffold - $\lambda$ t0 terminator - pUC ori - ApmR - pSG5 replicase - pSG5 ds origin - RP4 oriT | jadJ CRISPRa                              | 3e     |

Supplementary table 2. Example DNA plasmid sequences.

| Name and features                                                                                                                      | DNA sequence                                                                                                                                                                                                                                                                                                                                                                                                                                                                                                                                                                                                                                                                                                                                                                                                                                                                                                                                                                                                                                                                                                                                                                                                                                                                                                                                                                                                                                                                                                                                                                                                                                                                                                                                                                                                                                                                                                                                                                                                                                                                                                                                                                                                                                                                                                                                                                                                                                                                                                                                              |
|----------------------------------------------------------------------------------------------------------------------------------------|-----------------------------------------------------------------------------------------------------------------------------------------------------------------------------------------------------------------------------------------------------------------------------------------------------------------------------------------------------------------------------------------------------------------------------------------------------------------------------------------------------------------------------------------------------------------------------------------------------------------------------------------------------------------------------------------------------------------------------------------------------------------------------------------------------------------------------------------------------------------------------------------------------------------------------------------------------------------------------------------------------------------------------------------------------------------------------------------------------------------------------------------------------------------------------------------------------------------------------------------------------------------------------------------------------------------------------------------------------------------------------------------------------------------------------------------------------------------------------------------------------------------------------------------------------------------------------------------------------------------------------------------------------------------------------------------------------------------------------------------------------------------------------------------------------------------------------------------------------------------------------------------------------------------------------------------------------------------------------------------------------------------------------------------------------------------------------------------------------------------------------------------------------------------------------------------------------------------------------------------------------------------------------------------------------------------------------------------------------------------------------------------------------------------------------------------------------------------------------------------------------------------------------------------------------------|
| CRISPRi reporter<br><br>(Promoter-<br>RBS-<br>mCherry-<br>Terminator-<br>E.coli ori-<br>SpecR-oriT-<br>attP site-<br>phiC31 integrase) | CGAGACACCCGGGAAGCCTGATCTACGTCTGTTCGAGAAGTTTCTGATCG<br>ATGACACTCGTTCGTTACACGTTGCAGCAGAGTACTTGTTCACATTTCGA<br>ACGGTCTCTGCTTTGACAACATGCTGTGCGGTGTTGTAAAGTCGTGGCC<br>AGGAGAATACGACAGCGTGCAGGACTGGGGGAGTGCGCATATGGTCTC<br>CAAGGGCGAGGAGGACAACATGGCCATCATCAAGGAGTTCATGCGCTTC<br>AAGGTCCACATGGAGGGCTCCGTCAACGGGCACGAGTTCGAGATCGAG<br>GGCGAGGGGGAGGGCCGGCCGTACGAGGGCACCCAGACCGCCAAGCT<br>GAAGGTGACCAAGGGCGGCCCCCTCCCGTTCGCTGGGACATCCTCTC<br>CCCCAGTTCATGTACGGCTCGAAGGCCTACGTCAAGCACCCGGCCGA<br>CATCCCGGACTACCTGAAGCTCTCGTTCGCGAGGGGTTCAAGTGGGA<br>GCGGGTCATGAACCTCGAGGACGGCGGCGTTCGTACCCGTCACCCAGGA<br>CAGTCCCTGCAGGACGGCGAGTTCATCTACAAGGTCAAGCTGCGGGG<br>CACGAACCTCCCGAGCGACGGCCCCGTGATGCAGAAGAAGACGATGGG<br>CTGGGAAGCGTCCTCGGAGCGCATGTACCCGGAGGACGGCGCCCTCAA<br>GGGCGAGATCAAGCAGCGCCTGAAGCTGAAGGACGGCGGCCACTACGA<br>CGCCGAAGTCAAGACGACGTACAAGGCCAAGAAGCCGGTGCAGTCCC<br>GGACGCCTACAACGTGAACATCAAGCTCGACATCACCTCGCACAACGAG<br>GACTACACGATCGTGGAGCAGTACGAGCGCGCCGAGGGCCGGCACTCG<br>ACCGGCGGCATGGACGAGCTGTACAAGTGA GCCGTTTCGCGCCGCCCCG<br>GCTCGCATCGTCCCCGACCCGTCAACCTCATCCGCAAGGAGTCTCTAGA<br>GGATCCGCGGCCGCGCGGATATCGAATTCCTCGAGTAACTAGCATAAC<br>CCCTTGGGGCCTCTAAACGGGTCTTGAGGGGTTTTTTGTTAAGCCGAAC<br>AGGAAGCACAGCTCCTACTGAACATGTGAGCAAAGGCCAGCAAAGGC<br>CAGGAACCGTAAAAAGGCCGCGTTGCTGGCGTTTTTCCATAGGCTCCGC<br>CCCCCTGACGAGCATCACAAAAATCGACGCTCAAGTCAGAGGTGGCGAA<br>ACCCGACAGGACTATAAAGATACCAGGCGTTTCCCCCTGGAAGCTCCCT<br>CGTGCGCTCTCCTGTTCCGACCCTGCCGTTACCGGATACCTGTCCGCC<br>TTTCTCCCTTCGGGAAGCGTGGCGCTTTCTCATAGCTCACGCTGTAGGT<br>ATCTCAGTTCGGTGTAGGTCGTTTCGCTCCAAGCTGGGCTGTGTGCACGA<br>ACCCCCCGTTACGCCGACCGCTGCGCCTTATCCGGTAACTATCGTCTT<br>GAGTCCAACCCGTAAGACACGACTTATCGCCACTGGCAGCAGCCACTG<br>GTAACAGGATTAGCAGAGCGAGGTATGTAGGCGGTGCTACAGAGTTCTT<br>GAAGTGGTGGCCTAACTACGGCTACACTAGAAGAACAGTATTTGGTATCT<br>GCGCTCTGCTGAAGCCAGTTACCTTCGGAAAAAGAGTTGGTAGCTCTTG<br>ATCCGGCAAACAAACCACCGCTGGTAGCGGTGGTTTTTTGTTTGCAAG<br>CAGCAGATTACGCGCAGAAAAAAGGATCTCAAGAAGATCCTTTGATCTT<br>TTCTACGGGGTCTGACGCTCAGTGAACGAAAACCTCACGTTAAGGGATT<br>TTGGTCATGAGATTATCAAAAAGGATCTTCACCTAGATCCTTTTGGTTCAT<br>GTGCAGCTCCATCAGCAAAGGGGATGATAAGTTTATCACCACCGACTAT<br>TTGCAACAGTGCCGTTGATCGTGCTATGATCGACTGATGTCATCAGCGG<br>TGGAGTGCAATGTCATGCGCTCACGCAACTGGTCCAGAACCTTGACCGA<br>ACGCAGCGGTGGTAACGGCGCAGTGGCGGTTTTTCATGGCTTGTATGAC<br>TGTTTTTTTGGGGTACAGTCTATGCCTCGGGCATCCAAGCAGCAAGCGC<br>GTTACGCCGTGGGTGATGTTTGTATGTTATGGAGCAGCAACGATGTTAC<br>GCAGCAGGGCAGTCGCCCTAAAACAAAGTTAAACATC<br>ATGAGGGAAGCGGTGATCGCCGAAGTATCGACTCAACTATCAGAGGTAG<br>TTGGCGTCATCGAGCGCCATCTCGAACCGACGTTGCTGGCCGTACATTT |

GTACGGCTCCGCAGTGGATGGCGGCCTGAAGCCACACAGTGATATTGAT  
TTGCTGGTTACGGTGACCGTAAGGCTTGATGAAACAACGCGGCGAGCTT  
TGATCAACGACCTTTTGGAACTTCGGCTTCCCCTGGAGAGAGCGAGAT  
TCTCCGCGCTGTAGAAGTCAACCATTGTTGTGCACGACGACATCATTCCGT  
GGCGTTATCCAGCTAAGCGCGAACTGCAATTTGGAGAATGGCAGCGCAA  
TGACATTCTTGACAGGTATCTTCGAGCCAGCCACGATCGACATTGATCTGG  
CTATCTTGCTGACAAAAGCAAGAGAACATAGCGTTGCCTTGGTAGGTCCA  
GCGGCGGAGGAACTCTTTGATCCGGTTCCTGAACAGGATCTATTTGAGG  
CGCTAAATGAAACCTTAACGCTATGGAACCTCGCCGCCGACTGGGCTGG  
CGATGAGCGAAATGTAGTGCTTACGTTGTCCCGCATTTGGTACAGCGCA  
GTAACCGGCAAATCGCGCCGAAGGATGTCGCTGCCGACTGGGCAATG  
GAGCGCCTGCCGGCCCAGTATCAGCCCGTCATACTTGAAGCTAGACAG  
GCTTATCTTGGACAAGAAGAAGATCGCTTGGCCTCGCGCGCAGATCAGT  
TGGAAGAATTTGTCCACTACGTGAAAGGCGAGATCACCAAGGTAGTCGG  
CAAATAATTGTCTTTCTTCAGCTCGCTGATGATATGCCTTCCCTGGTTGGC  
TTGGTTTCATCAGCCATCCGCTTGCCCTCATCTGTTACGCCGGCGGTAG  
CCGGCCAGCCTCGCAGAGCAGGATTCCCCTTGAGCACCGCCAGGTGCC  
AATAAGGGACAGTGAAGAAGGAACACCCGCTCGCGGGTGGGCCTACTT  
CACCTATCCTGCCGGCTGACGCCGTTGGATACACCAAGGAAAGTCTAC  
ACGAACCCTTTGGCAAATCCTGTATATCGTGCGAAAAAGGATGGATATA  
CCGAAAAATCGCTATAATGACCCCGAAGCAGGGTTATGCAGCGGAAAA  
GATCCGTGCACCTGCAGGCATGCAAGCTCTAGCGATTCCAGACGTCCCG  
AAGGCGTGGCGCGGCTTCCCCGTGCCGGAGCAATCGCCCTGGGTGGGT  
TACACGACGCCCTCTATGGCCGTAAGTACGCGACACACCGAAGCCCC  
GGCGGCAACCCTCAGCGGATGCCCCGGGGCTTACGTTTTCCAGGTC  
AGAAGCGGTTTTCGGGAGTAGTGCCCAACTGGGGTAACCTTTGAGTTG  
TCTCAGTTGGGGGCGTAGGGTCCCGACATGACACAAGGGGTGTGAC  
CGGGGTGGACACGTACCGGGTGTACGACCGTCAGTCGCGCGAGCG  
CGAGAATTCGAGCGCAGCAAGCCCAGCGACACAGCGTAGCGCCAACGA  
AGACAAGGCGGCCGACCTTCAGCGCGAAGTCGAGCGCGACGGGGGCC  
GGTTCAGGTTCTGTCGGGCATTTAGCGAAGCGCCGGGCACGTCCGGCT  
TCGGGACGGCGGAGCGCCCGGAGTTCGAACGCATCCTGAACGAATGCC  
GCGCCGGGCGGCTCAACATGATCATTGTCTATGACGTGTCGCGCTTCTC  
GCGCCTGAAGGTCATGGACCGGATTCCGATTGTCTCGGAATTGCTCGCC  
CTGGGCGTGACGATTGTTTCCACTCAGGAAGGCGTCTTCCGGCAGGGAA  
ACGTCATGGACCTGATTCACCTGATTATGCGGCTCGACGCGTCGCACAA  
AGAATCTTCGCTGAAGTCGGCGAAGATTCTCGACACGAAGAACCTTCAG  
CGCGAATTGGGCGGGTACGTCCGGCGGAAGGCGCCTTACGGCTTCGAG  
CTTGTTTCGGAGACGAAGGAGATCACGCGCAACGGCCGAATGGTCAATG  
TCGTCATCAACAAGCTTGCACACTCGACCACTCCCCTTACCGGACCCTT  
CGAGTTCGAGCCCAGCGTAATCCGGTGGTGGTGGCGTGAGATCAAGAC  
GCACAAACACCTTCCCTTCAAGCCGGGCAGTCAAGCCGCCATTACCCG  
GGCAGCATCACGGGGCTTTGTAAGCGCATGGACGCTGACGCCGTGCCG  
ACCCGGGGCGAGACGATTGGGAAGAAGACCGCTTCAAGCGCCTGGGAC  
CCGGCAACCCTTATGCGAATCCTTCGGGACCCGCGTATTGCGGGCTTCG  
CCGCTGAGGTGATCTACAAGAAGAAGCCGGACGGCACGCCGACCACGA  
AGATTGAGGGTACCAGCATTACGCGGACCCGATCACGCTCCGGCCGG  
TCGAGCTTGATTGCGGACCGATCATCGAGCCCGCTGAGTGGTATGAGCT  
TCAGGCGTGGTTGGACGGCAGGGGGCGCGGCAAGGGGCTTCCC  
GGCAAGCCATTCTGTCCGCCATGGACAAGCTGTAAGTGCAGTGTGGCG  
CCGTCATGACTTCGAAGCGCGGGGAAGAATCGATCAAGGACTCTTACCG

|                                                                                                                                                                                                                                |                                                                                                                                                                                                                                                                                                                                                                                                                                                                                                                                                                                                                                                                                                                                                                                                                                                                                                                                                                                                                                                                                                                                                                                                                                                                                                                                                                                                                                                                                                                                                                                                                                                                                                                                                                                                                                                                                                                                                                                                                                                                                                  |
|--------------------------------------------------------------------------------------------------------------------------------------------------------------------------------------------------------------------------------|--------------------------------------------------------------------------------------------------------------------------------------------------------------------------------------------------------------------------------------------------------------------------------------------------------------------------------------------------------------------------------------------------------------------------------------------------------------------------------------------------------------------------------------------------------------------------------------------------------------------------------------------------------------------------------------------------------------------------------------------------------------------------------------------------------------------------------------------------------------------------------------------------------------------------------------------------------------------------------------------------------------------------------------------------------------------------------------------------------------------------------------------------------------------------------------------------------------------------------------------------------------------------------------------------------------------------------------------------------------------------------------------------------------------------------------------------------------------------------------------------------------------------------------------------------------------------------------------------------------------------------------------------------------------------------------------------------------------------------------------------------------------------------------------------------------------------------------------------------------------------------------------------------------------------------------------------------------------------------------------------------------------------------------------------------------------------------------------------|
|                                                                                                                                                                                                                                | <p>CTGCCGTCGCCGAAGGTGGTCGACCCGTCCGCACCTGGGCAGCACGA<br/> AGGCACGTGCAACGTCAGCATGGCGGCACTCGACAAGTTCGTTGCGGA<br/> ACGCATCTTCAACAAGATCAGGCACGCCGAAGGCGACGAAGAGACGTTG<br/> GCGCTTCTGTGGGAAGCCGCCGACGCTTCGGCAAGCTCACTGAGGCG<br/> CCTGAGAAGAGCGGCGAACGGGCGAACCTTGTTCGGAGCGCGCCGAC<br/> GCCCTGAACGCCCTTGAAGAGCTGTACGAAGACCGCGCGGCAGGCCGCG<br/> TACGACGGACCCGTTGGCAGGAAGCACTTCCGGAAGCAACAGGCAGCG<br/> CTGACGCTCCGGCAGCAAGGGGCGGAAGAGCGGCTTGCCGAACTTGAA<br/> GCCGCCGAAGCCCCGAAGCTTCCCCTTGACCAATGGTTCCCCGAAGAC<br/> GCCGACGCTGACCCGACCGGCCCTAAGTCGTGGTGGGGGCGCGCGTC<br/> AGTAGACGACAAGCGCGTGTTCGTCCGGCTCTTCGTAGACAAGATCGTT<br/> GTCACGAAGTCGACTACGGGCAGGGGGCAGGGAACGCCCATCGAGAAG<br/> CGCGCTTCGATCACGTGGGCGAAGCCGCCGACCGACGACGACGAAGAC<br/> GACGCCCAGGACGGCACGGAAGACGTAGCGGCGTAG</p>                                                                                                                                                                                                                                                                                                                                                                                                                                                                                                                                                                                                                                                                                                                                                                                                                                                                                                                                                                                                                                                                                                                                                                                                                                                                                                                         |
| <p>CRISPRi<br/> (Promoter-<br/> Riboz-RBS-<br/> dCas9-<br/> terminator-<br/> promoter-<br/> sgRNA<br/> targeting<br/> sequence-<br/> sgRNA<br/> scaffold-<br/> terminator-ori-<br/> AprR-pSG5<br/> rep-pSG5 ds-<br/> oriI)</p> | <p>TGTTACATTTCGAACCGTCTCTGCTTTGACATCGTGTGGCGCTTGGGTGT<br/> AAAGTCGTGGCCAATAAACAAAATTATTTGTAGAGGCTGTTTCGTCTCA<br/> CGGACTCATCAGACCGGAAAGCACATCCGGTGACAGCTAACTACGAAGG<br/> GGAGTCAGTATGGACAAGAAGTACAGCATCGGCCTGGCCATCGGCACCC<br/> AACAGCGTGGGCTGGGCGGTTCATCACCGACGAGTACAAGGTCCCCTCC<br/> AAGAAGTTCAAGGTCCTGGGCAACACCGACCGGCACTCGATCAAGAAGA<br/> ACCTGATCGGCGCCCTGCTCTTCGACAGCGGCGAAACCGCCGAGGCGA<br/> CCCGCCTGAAGCGGACCGCCGCTCGCCGCTACACCCGGCGCAAGAACC<br/> GCATCTGCTACCTGCAGGAGATCTTCTCCAACGAGATGGCCAAGGTTCGA<br/> CGACTCGTTCTTCCACCGGCTCGAGGAGAGCTTCTGTTGGAGGAGGA<br/> CAAGAAGCACGAGCGCCACCCGATCTTCGGCAACATCGTCGACGAGGT<br/> GGCCTACCACGAGAAGTACCCACCATCTACCACCTCCGCAAGAAGCTG<br/> GTCGACTCGACCGACAAGGCGGACCTGCGGCTCATCTACCTGGCCCTC<br/> GCGCACATGATCAAGTTCGCGGCGCACTTCTCATCGAGGGCGACCTGA<br/> ACCCGGACAACCTCCGACGTCGACAAGCTTTCATCCAGCTGGTGCAGAC<br/> CTACAACCAGCTGTTTCGAGGAGAACCCCATCAACGCCAGCGGCGTTCGA<br/> CGCCAAGGCGATCCTCTCCGCGCGCCTGAGCAAGTCCCGGCGCCTGGA<br/> GAACCTCATCGCCAGCTGCCGGGCGAGAAGAAGAACGGCCTCTTCGG<br/> CAACCTGATCGCGCTGTCGCTCGGCCTGACCCCAACTTCAAGAGCAAC<br/> TTCGACCTGGCCGAGGACGCGAAGCTCCAGCTGTCCAAGGACACCTAC<br/> GACGACGACCTGGACAACCTGCTCGCCAGATCGGCGACCAAGTACGCG<br/> GACCTCTTCTGGCCGCGAAGAACCTCTCGGACGCCATCCTGCTCAGCG<br/> ACATCCTGCGGGTCAACACCGAGATCACCAAGGCCCGCTGTCGGCGA<br/> GCATGATCAAGCGGTACGACGAGCACCACCAGGACCTGACCCTGCTCAA<br/> GGCCCTCGTGCGCCAGCAGCTGCCCGAGAAGTACAAGGAGATCTTCTTC<br/> GACCAGTCCAAGAACGGCTACGCCGGCTACATCGACGGCGGCGCGTTCG<br/> CAGGAGGAGTTCTACAAGTTCATCAAGCCGATCCTGGAGAAGATGGACG<br/> GCACCGAGGAGCTGCTCGTCAAGCTGAACCGCGAGGACCTGCTCCGCA<br/> AGCAGCGGACCTTCGACAACGGCTCCATCCCGCACCAAGATCCACCTGG<br/> GCGAGCTCCACGCCATCCTCCGGCGCCAGGAGGACTTCTACCCCTTCTC<br/> GAAGGACAACCGCGAGAAGATCGAGAAGATCCTGACCTTCCGGATCCC<br/> GTACTIONGTCGGCCCCCTGGCCCGCGGCAACTCCCGGTTCCGCGTGGAT<br/> GACCCGGAAGTCGGAGGAAACCATCACCCCGTGGAACTTCGAGGAGGT<br/> CGTGGACAAGGGCGCCTCCGCGCAGTCGTTTCATCGAGCGCATGACCAA<br/> CTTCGACAAGAACCTCCCGAACGAGAAGGTCTGCCAAGCACAGCCTG<br/> CTCTACGAGTACTTCACCGTGTACAACGAGCTGACCAAGGTCAAGTACG<br/> TGACCGAGGGCATGCGGAAGCCGGCCTTCTGTCCGGCGAGCAGAAGA</p> |



AGGCGATCGTCGACCTGCTCTTCAAGACCAACCGCAAGGTCACCGTGAA  
GCAGCTGAAGGAGGACTACTTCAAGAAGATCGAGTGCTTCGACTCCGTC  
GAGATCTCGGGCGTGGAGGACCGCTTCAACGCCTCCCTGGGCACCTAC  
CACGACCTGCTCAAGATCATCAAGGACAAGGACTTCCTCGACAACGAGG  
AGAACGAGGACATCCTGGAGGACATCGTCCTCACCCCTGACCCTCTTTCGA  
GGACCGCGAGATGATCGAGGAGCGGCTCAAGACCTACGCCACCTGTT  
CGACGACAAGGTGATGAAGCAGCTGAAGCGGCGCCGGTACACCGGCTG  
GGGCCGCTCTCCCGGAAGCTGATCAACGGCATCCGGGACAAGCAGAG  
CGGCAAGACCATCCTGGACTTCCTCAAGTCCGACGGCTTCGCCAACCGC  
AACTTCATGCAGCTCATCCACGACGACTCGCTGACCTTCAAGGAGGACA  
TCCAGAAGGCCAGGTGTCCGGCCAGGGCGACAGCCTCCACGAGCACA  
TCGCCAACCTGGCGGGCTCCCGGCGATCAAGAAGGGCATCCTCCAGA  
CCGTCAAGGTTCGTGGACGAGCTGGTCAAGGTGATGGGCCGCCACAAGC  
CCGAGAACATCGTGATCGAGATGGCCCGGGAGAACCAGACCACCAGA  
AGGGCCAGAAGAACTCCCGCGAGCGGATGAAGCGCATCGAGGAGGGCA  
TCAAGGAGCTCGGCTCGCAGATCCTGAAGGAGCACCCGGTCGAGAACA  
CCCAGCTCCAGAACGAGAAGCTGTACCTTACTACCTGCAGAACGGCCG  
CGACATGTACGTGGACCAGGAGCTCGACATCAACCGGCTGAGCGACTA  
CGACGTCGACGCCATCGTGCCGAGTCCTTCTGAAGGACGACTCGATC  
GACAACAAGGTCTGACCCGCTCCGACAAGAACCGGGGCAAGTCCGAC  
AACGTGCCCTCGGAGGAGGTCGTGAAGAAGATGAAGAATACTGGCGC  
CAGCTGCTCAACGCCAAGCTCATCACCCAGCGCAAGTTCGACAACCTGA  
CCAAGGCCGAGCGGGGCGGCCTGTGCGAGCTCGACAAGGCCGGGCTTC  
ATCAAGCGCCAGCTCGTCGAAACCCGGCAGATCACCAGCACGTGGCC  
CAGATCCTGGACAGCCGGATGAACACCAAGTACGACGAGAACGACAAG  
CTGATCCGCGAGGTCAAGGTGATCACCCCTCAAGAGCAAGCTGGTGTCCG  
ACTTCCGCAAGGACTTCCAGTTCTACAAGGTCCGGGAGATCAACAATA  
CCACCACGCCACGACGCGTACCTGAACGCCGTGCTGGGCACCGCGCT  
GATCAAGAAGTACCCGAAGCTGGAGTCCGAGTTCGTCTACGGCGACTAC  
AAGGTCTACGACGTGCGCAAGATGATCGCCAAGTCGGAGCAGGAGATC  
GGCAAGGCCACCGCGAAGTACTTCTTCTACAGCAACATCATGAACTTCT  
CAAGACCGAGATCACCCCTGGCCAACGGCGAGATCCGCAAGCGGCCCT  
GATCGAAACCAACGGCGAAACCCGGCGAGATCGTCTGGGACAAGGGCCG  
CGACTTCGCCACCGTCCGGAAGGTGCTGTCCATGCCGAGGTCAACATC  
GTCAAGAAAACCGAGGTGCAGACCGGCGGCTTCAGCAAGGAGTCCATC  
CTCCCCAAGCGCAACTCGGACAAGCTGATCGCCCGGAAGAAGGACTGG  
GACCCGAAGAAGTACGGCGGCTTCGACAGCCCCACCGTCGCCTACTCC  
GTGCTGGTTCGTGGCGAAGGTGAGAAAGGGCAAGAGCAAGAAGCTGAAG  
TCCGTGAAGGAGCTGCTCGGCATCACCATCATGGAGCGCTCCTCGTTCC  
AGAAGAACCCGATCGACTTCTGGAGGCCAAGGGCTACAAGGAGGTCA  
AGAAGGACCTCATCATCAAGCTGCCAAGTACTCGCTGTTTCGAGCTCGA  
GAACGGCCGCAAGCGGATGCTCGCCAGCGCGGGCGAGCTGCAGAAGG  
GCAACGAGCTGGCCCTCCCGTCCAAGTACGTCAACTTCTGTACCTCGC  
GTCCCACTACGAGAAGCTGAAGGGCTCGCCCGAGGACAACGAGCAGAA  
GCAGCTTTCGTGGAGCAGCACAAGCACTACCTGGACGAGATCATCGAG  
CAGATCTCGGAGTTCAGCAAGCGGGTCATCCTGGCCGACGCGAACCTC  
GACAAGGTGCTGTCCGCCTACAACAAGCACCGCGACAAGCCGATCCGG  
GAGCAGGCGGAGAACATCATCCACCTGTTACCCCTACCAACCTGGGCG  
CCCCCGCCGCTTCAAGTACTTCGACACCACCATCGACC GCAAGCGGTA  
CACCAGCACCAAGGAGGTCCTCGACGCGACCCTGATCCACCAGTCCATC  
ACCGGCCTGTACGAAACCCGCATCGACCTCTCCAGCTCGGCGGCGAC

TGA GAATTCAGATCTACGCGTTCCCCGCAAAGCGGCCTTTGACTCCCT  
GCAAGCCTCAGCGACCGAATATATCGGTTATGCGTGGGCGATGGTTGTT  
GTCATTGTCGGCGCAACTATCGGTATCAAGCTGTTAAGAAATTCACCTC  
GAAAGCAAGCTGATAAACCGATACAATTAAGGCTCCTTTTGGAGCCTTT  
TTTTGACAGCGTGCAGGACTGGGGGAGTTATGTTTACATTTCGAACCGTC  
TCTGCTTTGACACGGACAAGCGCTATGGTGTAAAGTCGTGGCCACATGT  
TGTCCCTCCTCGCCCTGTTTTAGAGCTAGAAATAGCAAGTTAAAATAAGGC  
TAGTCCGTTATCAACTTGAAAAAGTGGCACCGAGTCGGTGC TTTTACTC  
CATCTGGATTTG TTCAGAACGCTCGGTTGCCGCGGGCGTTTTTAT CTA  
GAGGCCAGGAACCGTAAAAAGGCCGCGTTGCTGGCGTT TTTCCATAGGC  
TCCGCCCCCTGACGAGCATCAAAAAATCGACGCTCAAGTCAGAGGTG  
GCGAAACCCGACAGGACTATAAAGATACCAGGCGTTTCCCCTGGAAGC  
TCCCTCGTGCCTCTCCTGTTCCGACCCTGCCGCTTACCGGATACCTGT  
CCGCTTTCTCCCTTCGGGAAGCGTGGCGCTTTCTCATAGCTCACGCTG  
TAGGTATCTCAGTTCGGTGTAGGTGCTTCCGCTCCAAGCTGGGCTGTGTG  
CACGACCCCCCGTTCAGCCCGACCGCTGCGCCTTATCCGTAACACTATC  
GTCTTGAGTCCAACCCGTAAGACACGACTTATCGCCACTGGCAGCAGC  
CACTGGTAACAGGATTAGCAGAGCGAGGTATGTAGGCGGTGCTACAGAG  
TTCTTGAAGTGGTGGCCTAACTACGGCTACACTAGAAGAACAGTATTTGG  
TATCTGCGCTCTGCTGAAGCCAGTTACCTTCGAAAAAGAGTTGGTAGCT  
CTTGATCCGGCAAACAAACCACCGCTGGTAGCGGTGGTTTTTTTGGTTGC  
AAGCAGCAGATTACGCGCAGAAAAAAGGATCTCAA GAAGATCCTTTGAT  
CTTTTCTACGGGGTCTGACGCTCAGTGGAACGAAAACACTCACGTTAAGGG  
ATTTTGGTCATGAGATTATCAAAAAGGATCTTACCTAGATCCTTTTGGTT  
CATGTGCAGCTCCATCAGCAAAAAGGGGATGATAAGTTTATCACCACCGA  
CTATTTGCAACAGTGCCGTTGATCGTGCTATGATCGACTGATGTCATCAG  
CGGTGGAGTGCAATGTCGTGCAATACGAATGGCGAAAAGCCGAGCTCAT  
CGGTGAGCTTCTCAACCTTGGGGTTACCCCCGGCGGTGTGCTGCTGGTC  
CACAGCTCCTCCGTAGCGTCCGGCCCCTCGAAGATGGGCCACTTGA  
CTGATCGAGGCCCTGCGTGCTGCGCTGGGTCCGGGAGGGACGCTCGTC  
ATGCCCTCGTGGTCAGGTCTGGACGACGAGCCGTTTCGATCCTGCCACGT  
CGCCCGTTACACCGGACCTTGGAGTTGTCTCTGACACATTCTGGCGCCT  
GCCAAATGTAAAGCGCAGCGCCATCCATTTGCCTTTGCGGCAGCGGG  
GCCACAGGCAGAGCAGATCATCTCTGATCCATTGCCCTGCCACCTCAC  
TCGCCTGCAAGCCCGTTCGCCCGTGTCCATGAACTCGATGGGCAGGTA  
CTTCTCCTCGGCGTGGGACACGATGCCAACACGACGCTGCATCTTGCCG  
AGTTGATGGCAAAGTTCCCTATGGGGTGCCGAGACACTGCACCATTCT  
TCAGGATGGCAAGTTGGTACGCGTGCATTATCTCGAGAATGACCACTGC  
TGTGAGCGCTTTGCCTTGGCGGACAGGTGGCTCAAGGAGAAGAGCCTT  
CAGAAGGAAGGTCCAGTCGGTCATGCCTTTGCTCGGTTGATCCGCTCCC  
GCGACATTGTGGCGACAGCCCTGGGTCAACTGGGCCGAGATCCGTTGA  
TCTTCCTGCATCCGCCAGAGGCGGGATGCGAAGAATGCGATGCCGCTC  
GCCAGTCGATTGGCTGAGCTCATGAGCGGAGAACGAGATGACGTTGGA  
GGGGCAAGGTCGCGCTGATTGCTGGGGCAACACGTGGAGCGGATCGG  
GGATTGTCTTTCTTACGCTCGCTGATGATATGCTGACGCTCAATGCCGTT  
TGGCCTCCGACTAACGAAAATCCCGCATTGGACGGCTGATCCGATTGG  
CACGGCGGACGGCGAATGGCGGAGCAGACGCTCGTCCGGGGGCAATG  
AGATATGAAAAAGCCTGAACTCACCGCGACGTATCGATGTCGAGGTTCC  
TCAGGGGAGCCACCCAGAGAAGCCCTCGGAGCTGAGCGGAGCTATTT  
CCAAAGCCATGCCAGCTAGAGACAGTGACACCGCCAAGCATCTGCAAA  
ACCCTCGCCTGGAGGGAAAGTGCAATGTACGTACGCTGGTTCCCTCCA

GAAAGGGATTCTGCGGCTTCTCAACTTTGGAAGAAGAGGCGGAACGAAC  
TGCTGTTTCAGCCTACTCATGTGAGGAGGCTGGTCCTTTACCCTGATGC  
CCGAGGGCATCAGGGTAAAGGACCAGCCTCGCCAAGTAGGAGCGCTAC  
CAAGGGCAACACAACCCAGGACTTGGTAGAACCTTCGCCGGAGAAGTT  
CAGACTCATCGGCATGAGCACCCCTCGCCGCGCACTCGGCACCGGTCC  
GTCGACCACCACCAGGACGTCGTTGTCGACGTCGGCCCCGCGGCTCCT  
GCCCCGCGAACGCGTCGTCGTCGACGGCCTGGTGCTCATCGACGAGCA  
CCCGGAGCCAGGTGAAAAGCGCCGGCGGACGCTCGGACTGGGCGCGG  
GATTCCAGCAGTAACCCAGGTCCGCCGGCCACCTCACGGCAGGCAGAC  
CCTCGGCTTTGCGGCCGGGACCGCCATGAGACCGCCACCCGGATGTCC  
GGGGTGGCGGTCTCATGGCGGTCCCTCAGCGGCCCTACGCGACCGCTG  
TGTCGACGCGGAGGCAGTCTCCGGGGTGGTGGCCCCAGGGCTGGAGTA  
CCGGGGCGAGCTTGCCCTTGACGCGGCGGCACACGGGCGACGCGGCG  
CCGGGGCGGGGAGTCTTGACGTCGACGGTGACCGGCTTCGGCTTCAGG  
CGCTTCCGAAGGCTGATCGTCGGGCGGATCGCCTCCTTCTTCGGCTGAC  
GCACTCGGTCGAGCGAAGCGGCCAGCTCCTCCGTGCGGGCCTCGTTGG  
CCTTCCGGCGCGCCTCGCGGAAAGCAGCTTCTCCTCGGACATGACCT  
CGAACCTCATCTGGTCAGCGTCAAGGTCGCCCGGCGCGGCCGGCGCTT  
CCGGGGCGGGCGGGTCCAGGACGTCTTGCCCCACACCAGGCCCCAG  
GACTCGACGAGCCGCCGACGCCCGGTAGGCCGTACGTCTCGGCGAC  
CTTGATGAGGTCGAGGCGACGTCCGGCGACGCGGGCGATGTATCGGTA  
CCAGATGTAGGCCGGGATGACCGCGATGGCGACCAGGCCCTCGGTGTC  
GTCGGTGATCTCCTCCTCGGTGCGGACGTCTGCTGGATGCCGAGTTCC  
TTGATCAGCCGTTTCAGGTTCTGCGACCGGTAGTGCTTTCGGACCTGGA  
ACACGCCGAACCTCGCGCTCGCGGTAATCTCGACGAACGGGCCGGGCC  
GACGAAGCCGCTGCAGCTCGGCGGCCCGCCGCTCGCCCAGGTCGAGC  
GGTCCCATGCGGTGTCGCGCCGACCGGCCCTGAAGTTCTGTCCGGCC  
AGCTCCAGGCCGATCTTGGCGACGCCGCCCTTGGTCTTGTCCCGTCTC  
TGTAGAGGTAGCGGGCCTGCTTGCCCGCATCGCCGTACGCGGCGTCCG  
CGCCGTTGAGTGGGCGCACGTCCGGTGCCGTGGCCCTTGCCCTCACAGG  
AGCAACCGGGCCGGTCGCACGTCTCGCTGACGGTGTAGCCGCCCGCG  
GATTCCGACCCCGGCGGCCAGGCTCCGGCGAGTGCGTTCGCGGAACGC  
GGCCTGGGCGTCCGGGCCGAGCACCTCGCGGGTGACCCAGAGCGTGT  
GCCAGTGCAGGTGCCAGCCGGAGCCCCAGCCGAAGGTGTCTCGAAGG  
CCCGCTCGTAGCCGATGATCCCGAAGTCGTCGCGCATCGTGCGCCAGC  
GGCGGCCGGACGAGCCGTACGCGCCCTTCCAGCCGTCGTGCAAGACC  
GCGACCAGGCCGTGCCGATTCCCTTGGCGACGGTGCCGAACGCCATC  
CGCTCGAAGTGGCGCAACGTGTTTCGTGCCAAGGTGCAGCCCGTACCCG  
GCGTCCGCGAGACCGTCCGGCGGCGAGCTGCACGTTGAGCCCCGTAC  
GGCCAGGATGCGGCTCATGCACCACGGGCAGGTGTGGACGTTGTTGCA  
GCGGCACGTGTTGCCCCACGTGCGCTCGCCCGGCTTCCACATCAGCTC  
GGCCGTCCCGGCAGTGAGCCGGGTCCCGCAGCCCTTGAACGCCTCGTT  
CAGCGACACCGTCTGGTGCCGGTCCCGCCGGGCGAACCCTCGTTCGCG  
GCGGGTCCCTCCCGCCCGGCTGTGCGCGCACCCCTCGTTTGGGGTAGAAC  
CCGTTCCAGTTACAGCGCTCTGACCTGCAGTGGACGGAGATTTCCCTT  
ACTACTAAAGCCCGCGTCCGGATTACCCGCTGTAGTCGTGCTTGCTACG  
CTGCGTGACTGGTCCGCAATGAGACGCTTTGCGCGCTTTCGGCAGGCG  
TCCGAGCAGTAGATTTTGGGGCGCTTCCCGGGGATGTGGACGATCGGG  
GTGCCGCAAGTGGCACTTCGGTCCGGCGGGGCGCGGTGGTGTGACGC  
GCTGTTCTCTCGTACGCTCGTCACAGAGCAAACGTCCTCACTCGGCATG  
CTGCGCCGGTTCGGGGGGCGGCGAGCCCGGGAGGCCAATCCCGGGCTC

|                                                                                                                                                                                                                                                               |                                                                                                                                                                                                                                                                                                                                                                                                                                                                                                                                                                                                                                                                                                                                                                                                                                                                                                                                                                                                                                                                                                                                                                                                                                                                                                                                                                                                                                                                                                                                                                                                                          |
|---------------------------------------------------------------------------------------------------------------------------------------------------------------------------------------------------------------------------------------------------------------|--------------------------------------------------------------------------------------------------------------------------------------------------------------------------------------------------------------------------------------------------------------------------------------------------------------------------------------------------------------------------------------------------------------------------------------------------------------------------------------------------------------------------------------------------------------------------------------------------------------------------------------------------------------------------------------------------------------------------------------------------------------------------------------------------------------------------------------------------------------------------------------------------------------------------------------------------------------------------------------------------------------------------------------------------------------------------------------------------------------------------------------------------------------------------------------------------------------------------------------------------------------------------------------------------------------------------------------------------------------------------------------------------------------------------------------------------------------------------------------------------------------------------------------------------------------------------------------------------------------------------|
|                                                                                                                                                                                                                                                               | <p>GTGCCATTTCTGGGTCCTGTTGATCCTGGCATTGGTGTGGCCGTTTCATT<br/> GCCCTGCTCGCTCCTGACGCGCCGATAGACGTCCGATACGCCCGGTG<br/> CTGGTGGGATTTGATAGGTCGGAAGAAGCCCCGCCGGCCTGGGCGG<br/> GGCTTCCTGTGCGTCAGGACCTCCTCGTCTGAGCCTCTTCGGCCTATG<br/> GACGGAGTGACCTCGTGATCCGTTACAGCCGCGCGCGCTCGCGTAGAG<br/> CGGTCTCATCAGTTCCACGAACGGTCTCTTCGCAGATCAGGGCGTTGG<br/> GGCGGAGTCTCACCAAGGACTACGTCTGCTGGCGATTTCCGTTACACCC<br/> CGGGCGGTGGCCGGCGCACACGCGCGCCCGCGTTGGGCAGTGCAGAA<br/> AGTGCAGAAACCTAGGCGCTGATGGTCCAGGTCCACGGTTCGTCTGTCG<br/> GCGGCGGCGCGGGCGGCGGCGTCCGGCCAGGGCGCGGGCGAGACCGG<br/> CTACGGCGGGCTTGATGCGCCGGTTGCGGGCGACCTTGAGCAGCTAGT<br/> ATGCAGGTCGACGGATCTTTTCCGCTGCATAACCCTGCTTCGGGGTCAT<br/> TATAGCGATTTTTTCGGTATATCCATCCTTTTTTCGCACGATATACAGGATT<br/> TTGCCAAAGGGTTCGTGTAGACTTTCTTGGTGTATCCAACGGCGTCAG<br/> CCGGGCAGGATAGGTGAAGTAGGCCACCCGCGAGCGGGTGTTCCTTC<br/> TTCACTGTCCCTTATTCGCACCTGGCGGTGCTCAACGGGAATCCTGCTC<br/> TGCGAGGCTGGCCGGCTACCGCCGGCGTAACAGATGAGGGCAAGCGG<br/> ATGGCTGATGAAACCAAGCCAACCAGGAAGGGCAGCCACCTATCAAGG<br/> TGTACTGCCTTCAGACGAACGAAGAGCGATTGAGGAAAAGGCGGCGG<br/> CGGCCGGCATGAGCCTGTCGGCCTACCTGCTGGCCGTGCGCCAGGGCT<br/> ACAAAATCACGGGCGTCTGGACTATGAGCACGTCCGCGAGCTGGACA<br/> GCGTGCAGGACTGGGGGAGTTA</p>                                                                                                                                                                                                                                                                                                                                                                                                             |
| <p><b>CRISPRa</b></p> <p>(Promoter-<br/> Rib.-RBS-<br/> dCas9-XTEN<br/> linker - AD -<br/> terminator-<br/> promoter-<br/> sgRNA<br/> targeting<br/> sequence-<br/> sgRNA<br/> scaffold-<br/> terminator-ori-<br/> AprR-pSG5<br/> rep-pSG5 ds-<br/> oriT)</p> | <p>TGTTACATTTCGAACCGTCTCTGCTTTGACATCGTGTGGCGCTTGGGTG<br/> TAAAGTCGTGGCCA TAAACAAAAATTATTGTAGAGGCTGTTTCGTCTC<br/> ACGGACTCATCAGACCCGAAAGCACATCCGGTGACAGCT AACTACGAA<br/> GGGAGTCAGT ATGGACAAGAAGTACAGCATCGGCCTGGCCATCGGCA<br/> CCAACAGCGTGGGCTGGGCGGTATCACCCGACGAGTACAAGGTCCCCT<br/> CCAAGAAGTTCAAGGTCTGGGCAACACCGACCGGCACTCGATCAAGA<br/> AGAACCTGATCGGCGCCCTGCTCTTCGACAGCGGCGAAACCGCCGAG<br/> GCGACCCGCCTGAAGCGGACCGCCCGTCCGCGCTACACCCGGCGCAA<br/> GAACCGCATCTGCTACCTGCAGGAGATCTTCTCCAACGAGATGGCCAA<br/> GGTCGACGACTCGTTCTTCCACCGGCTCGAGGAGAGCTTCTTGGTGGGA<br/> GGAGGACAAGAAGCACGAGCGCCACCCGATCTTCGGCAACATCGTCTGA<br/> CGAGGTGGCCTACCACGAGAAGTACCCACCATCTACCACCTCCGCAA<br/> GAAGCTGGTCTGACTCGACCGACAAGGCGGACCTGCGGCTCATCTACCT<br/> GGCCCTCGCGCACATGATCAAGTTCGCGGCCACTTCTCATCGAGGG<br/> CGACCTGAACCCGGACAACCTCCGACGTCGACAAGCTTTCATCCAGCT<br/> GGTGCAGACCTACAACCAGCTGTTTCGAGGAGAACCCCATCAACGCCAG<br/> CGGCGTCGACGCCAAGGCGATCCTCTCCGCGCGCCTGAGCAAGTCCC<br/> GGCGCCTGGAGAACCTCATCGCCAGCTGCCGGGCGAGAAGAAGAAC<br/> GGCCTCTTCGGCAACCTGATCGCGCTGTGCTCGGCCTGACCCCAAC<br/> TTCAAGAGCAACTTCGACCTGGCCGAGGACGCGAAGCTCCAGCTGTCC<br/> AAGGACACCTACGACGACGACCTGGACAACCTGCTCGCCAGATCGGC<br/> GACCAGTACGCGGACCTCTTCTGGCCGCGAAGAACCTCTCGGACGCC<br/> ATCCTGCTCAGCGACATCCTGCGGGTCAACACCGAGATCAACCAAGGCG<br/> CCGCTGTCGGCGAGCATGATCAAGCGGTACGACGAGCACCACCAGGA<br/> CCTGACCCTGCTCAAGGCCCTCGTGCGCCAGCAGCTGCCCGAGAAGTA<br/> CAAGGAGATCTTCTTCGACCAGTCCAAGAACGGCTACGCCGGCTACAT<br/> CGACGGCGGCGCGTCCGAGGAGGAGTTCTACAAGTTCATCAAGCCGAT<br/> CCTGGAGAAGATGGACGGCACCGAGGAGCTGCTCGTCAAGCTGAACC<br/> GCGAGGACCTGCTCCGCAAGCAGCGGACCTTCGACAACGGCTCCATCC</p> |

CGCACCAGATCCACCTGGGCGAGCTCCACGCCATCCTCCGGCGCCAG  
GAGGACTTCTACCCCTTCTGAAGGACAACCGCGAGAAGATCGAGAAG  
ATCCTGACCTTCCGGATCCCGTACTACGTCGGCCCCCTGGCCCGCGGC  
AACTCCCGGTTTCGCGTGGATGACCCGGAAGTCGGAGGAAACCATCACC  
CCGTGGAACTTCGAGGAGGTCGTGGACAAGGGCGCCTCCGCGCAGTC  
GTTTCATCGAGCGCATGACCAACTTCGACAAGAACCTCCCGAACGAGAA  
GGTCCTGCCAAGCACAGCCTGCTCTACGAGTACTTCACCGTGTACAA  
CGAGCTGACCAAGGTCAAGTACGTGACCCGAGGGCATGCGGAAGCCGG  
CCTTCTGTCCGGCGAGCAGAAGAAGGCGATCGTCGACCTGCTCTTCA  
AGACCAACCGCAAGGTCACCGTGAAGCAGCTGAAGGAGGACTACTTCA  
AGAAGATCGAGTGCTTCGACTCCGTTCGAGATCTCGGGCGTGGAGGACC  
GCTTCAACGCCTCCCTGGGCACCTACCACGACCTGCTCAAGATCATCAA  
GGACAAGGACTTCTCGACAACGAGGAGAACGAGGACATCCTGGAGGA  
CATCGTCTCACCCCTGACCCTTTCGAGGACCGCGAGATGATCGAGGA  
GCGGCTCAAGACCTACGCCACCTGTTTCGACGACAAGGTGATGAAGCA  
GCTGAAGCGGCGCCGGTACACCGGCTGGGGCCGCCTTCCCGGAAGC  
TGATCAACGGCATCCGGGACAAGCAGAGCGGCAAGACCATCCTGGACT  
TCCTCAAGTCCGACGGCTTCGCCAACCGCAACTTCATGCAGCTCATCCA  
CGACGACTCGCTGACCTTCAAGGAGGACATCCAGAAGGCCAGGTGTC  
CGGCCAGGGCGACAGCCTCCACGAGCACATCGCCAACCTGGCGGGCT  
CCCCGGCGATCAAGAAGGGCATCCTCCAGACCGTCAAGGTCGTGGAC  
GAGCTGGTCAAGGTGATGGGCCGCCACAAGCCCGAGAACATCGTGATC  
GAGATGGCCCGGAGAACAGACCACCCAGAAGGGCCAGAAGAACTC  
CCGCGAGCGGATGAAGCGCATCGAGGAGGGCATCAAGGAGCTCGGCT  
CGCAGATCCTGAAGGAGCACCCGGTCGAGAACACCCAGCTCCAGAACG  
AGAAGCTGTACCTTACTACTGTCAGAACGGCCGCGACATGTACGTGG  
ACCAGGAGCTCGACATCAACCGGCTGAGCGACTACGACGTGACGCCA  
TCGTGCCGACGTCCTTCTGAAGGACGACTCGATCGACAACAAGGTCC  
TGACCCGCTCCGACAAGAACCGGGGCAAGTCCGACAACGTGCCCTCG  
GAGGAGGTCGTGAAGAAGATGAAGAATACTGGCGCCAGCTGCTCAAC  
GCCAAGCTCATACCCAGCGCAAGTTCGACAACCTGACCAAGGCCGAG  
CGGGGCGGCCTGTTCGGAGCTCGACAAGGCGGGCTTCATCAAGCGCCA  
GCTCGTCAAACCCGGCAGATCACCAAGCACGTGGCCCAGATCCTGGA  
CAGCCGGATGAACACCAAGTACGACGAGAACGACAAGCTGATCCGCGA  
GGTCAAGGTGATCACCCCTCAAGAGCAAGCTGGTGTCCGACTTCCGCAA  
GGACTTCCAGTTCTACAAGGTCCGGGAGATCAACAATACTACCACCACGC  
CCACGACGCGTACCTGAACGCCGTCGTGGGCACCGCGCTGATCAAGAA  
GTACCCGAAGCTGGAGTCCGAGTTCGTCTACGGCGACTACAAGGTCTA  
CGACGTGCGCAAGATGATCGCCAAGTCGGAGCAGGAGATCGGCAAGG  
CCACCGCAAGTACTTCTTCTACAGCAACATCATGAACTTCTTCAAGAC  
CGAGATCACCTGGCCAACGGCGAGATCCGCAAGCGGCCCTGATCG  
AAACCAACGGCGAAACCGGCGAGATCGTCTGGGACAAGGGCCGCGAC  
TTCGCCACCGTCCGGAAGGTGCTGTCCATGCCGCAAGTCAACATCGTC  
AAGAAAACCGAGGTGCAGACCGGCGGCTTCAGCAAGGAGTCCATCCTC  
CCCAAGCGCAACTCGGACAAGCTGATCGCCCCGGAAGAAGGACTGGGA  
CCCGAAGAAGTACGGCGGCTTCGACAGCCCCACCGTCGCCTACTCCGT  
GCTGGTCGTGGCGAAGGTGAGAAAGGGCAAGAGCAAGAAGCTGAAGT  
CCGTGAAGGAGCTGCTCGGCATCACCATCATGGAGCGCTCCTCGTTCC  
AGAAGAACCCGATCGACTTCTGGAGGCCAAGGGCTACAAGGAGGTCA  
AGAAGGACCTCATCATCAAGCTGCCAAGTACTCGCTGTTTCGAGCTCGA  
GAACGGCCGCAAGCGGATGCTCGCCAGCGCGGGCGAGCTGCAGAAGG

GCAACGAGCTGGCCCTCCCGTCCAAGTACGTCAACTTCCTGTACCTCG  
CGTCCCCTACGAGAAGCTGAAGGGCTCGCCCGAGGACAACGAGCAG  
AAGCAGCTCTTCGTGGAGCAGCACAAAGCACTACCTGGACGAGATCATC  
GAGCAGATCTCGGAGTTCAGCAAGCGGGTCATCCTGGCCGACGCGAAC  
CTCGACAAGGTGCTGTCCGCCTACAACAAGCACCCGCGACAAGCCGATC  
CGGGAGCAGGCGGAGAACATCATCCACCTGTTACCCTCACCAACCTG  
GGCGCCCCCGCCGCTTCAAGTACTTCGACACCACCATCGACCCGCAAG  
CGGTACACCAGCACCAAGGAGGTCTCGACGCGACCCTGATCCACCAG  
TCCATCACCGGCCTGTACGAAACCCGCATCGACCTCTCCAGCTCGGC  
GGCGACTGAAAGTGGCTCAGAGACGCCGGTACTTCTGAGTCCGCTACG  
CCTGAGAGCATGCTTATCGCTCAGCGTCCTTCGCTGACCGAAGAGGTG  
GTCGACGAGTTCGCTCCCGGTTCTGTGATCGAGCCGCTGGAGCCGGG  
CTTCGGCTACACCCTCGGCAACTCCCTCCGCCGTACCCTCCTCTCCTG  
GATCCCGGGTGCCGCTGTCACCAGCATCCGCATCGACGGTGTCTGCA  
CGAGTTCACCACCGTGCCGGGCGTCAAGGAGGACGTCACCAGCCTCAT  
CCTCAACATCAAGCAGCTGGTCTCTCCTCGGAGCACGACGAGCCGGT  
CGTGATGTACCTGCGCAAGCAGGGCCCGGGTCTGGTACCAGCCGCGG  
ACATCGCGCCCCCGGCCGGTGTGAGGTGCACAACCCCGACCTCGTC  
CTCGCCACGCTCAACGGCAAGGGCAAGCTGGAGATGGAGCTGACCGT  
CGAGCGCGGTGCGGGCTACGTCTCCGCCGTGCAGAACAAGCAGGTG  
GTCAGGAGATCGGGCGCATCCCGGTCGACTCGATCTACTCGCCGGTTC  
TCAAGGTCACCTACAAGTTCGAGGCGACCCGAGTCGAGCAGCGCACC  
GACTTCGACAAGCTGATCGTCGACGTCGAGACCAAGCAGGCCATGCGC  
CCGCGTGACGCCATGGCGTCCGCCGGCAAGACCCTGGTTCGAGCTGTT  
CGGTCTGGCGCGCGAGCTCAACATCGACGCGGAATTCAGATCTACCGG  
TTCCCCGCAAAGCGGCCTTTGACTCCCTGCAAGCCTCAGCGACCGAA  
TATATCGGTTATGCGTGGGCGATGGTTGTTGTATTGTCGGCGCAACTA  
TCGGTATCAAGCTGTTAAGAAATTCACCTCGAAAGCAAGCTGATAAAC  
CGATAACAATTAAGGCTCCTTTTGGAGCCTTTTTTGGACAGCGTGCAGG  
ACTGGGGGAGTTATGTTACATTGAAACCGTCTCTGCTTTGACACGGAC  
AAGCGCTATGGTGTAAAGTTCGTTGGCCACGTCAGAATTCACAAGCCCG  
TTTTAGAGCTAGAAATAGCAAGTAAATAAGGCTAGTCCGTTATCAACT  
TGAAAAAGTGGCACCGAGTCCGGTGTCTTTTACTCCATCTGGATTTGTTT  
AGAACGCTCGGTTGCCGCCGGGCGTTTTTTATCTAGAGGCCAGGAACC  
GTA AAAAGGCCGCGTTGCTGGCGTTTTCATAGGCTCCGCCCCCTG  
ACGAGCATCACAAAAATCGACGCTCAAGTCAGAGGTGGCGAAACCCGA  
CAGGACTATAAAGATAACAGGCGTTTCCCCTGGAAGCTCCCTCGTGC  
GCTCTCCTGTTCCGACCCTGCCGCTTACCGGATACCTGTCCGCCTTTCT  
CCCTTCGGGAAGCGTGGCGCTTCTCATAGCTCACGCTGTAGGTATCTC  
AGTTCGGTGTAGGTCGTTTCGCTCCAAGCTGGGCTGTGTGCACGACCC  
CCCGTTACGCCGACCGCTGCGCCTTATCCGGTAACTATCGTCTTGAGT  
CCAACCCGGTAAGACACGACTTATCGCCACTGGCAGCAGCCACTGGTA  
ACAGGATTAGCAGAGCGAGGTATGTAGGCGGTGCTACAGAGTTCTTGA  
AGTGGTGGCCTAACTACGGCTACACTAGAAGAACAGTATTTGGTATCTG  
CGCTCTGCTGAAGCCAGTTACCTTCGAAAAAGAGTTGGTAGCTCTTGA  
TCCGGCAAACAACCCAGCTGGTAGCGGTGGTTTTTTTGTGGCAAGC  
AGCAGATTACGCGCAGAAAAAAGGATCTCAAGAAGATCCTTTGATCTT  
TTCTACGGGTCTGACGCTCAGTGGAAACGAAAACCTCACGTTAAGGGATT  
TTGGTTCATGAGATTATCAAAAAGGATCTTACCTAGATCCTTTTGGTTCA  
TGTGCAGCTCCATCAGCAAAAAGGGGATGATAAGTTTATCACCCCGACT  
ATTTGCAACAGTGCCGTTGATCGTGCTATGATCGACTGATGTCATCAGC

GGTGGAGTGCAATGTCGTGCAATACGAATGGCGAAAAGCCGAGCTCAT  
CGGTCAGCTTCTCAACCTTGGGGTTACCCCCGGCGGTGTGCTGCTGGT  
CCACAGCTCCTTCCGTAGCGTCCGGCCCCTCGAAGATGGGCCACTTGG  
ACTGATCGAGGCCCTGCGTGCTGCGCTGGGTCCGGGAGGGACGCTCG  
TCATGCCCTCGTGGTCAGGTCTGGACGACGAGCCGTTTCGATCCTGCCA  
CGTCGCCCCGTTACACCGGACCTTGGAGTTGTCTCTGACACATTCTGGC  
GCCTGCCAAATGTAAAGCGCAGCGCCCATCCATTTGCCTTTGCGGCAG  
CGGGGCCACAGGCAGAGCAGATCATCTCTGATCCATTGCCCTGCCAC  
CTCACTCGCCTGCAAGCCCGGTGCCCCGTGTCCATGAACTCGATGGGC  
AGGTAATTCTCCTCGGCGTGGGACACGATGCCAACACGACGCTGCATC  
TTGCCGAGTTGATGGCAAAGGTTCCCTATGGGGTGCCGAGACACTGCA  
CCATTCTTCAGGATGGCAAGTTGGTACGCGTCGATTATCTCGAGAATGA  
CCACTGCTGTGAGCGCTTTGCCTTGGCGGACAGGTGGCTCAAGGAGAA  
GAGCCTTCAGAAGGAAGGTCCAGTCGGTCATGCCTTTGCTCGGTTGAT  
CCGCTCCCGCGACATTGTGGCGACAGCCCTGGGTCAACTGGGCCGAG  
ATCCGTTGATCTTCCTGCATCCGCCAGAGGCGGGATGCGAAGAATGCG  
ATGCCGCTCGCCAGTCGATTGGCTGAGCTCATGAGCGGAGAACGAGAT  
GACGTTGGAGGGGCAAGGTCGCGCTGATTGCTGGGGCAACACGTGGA  
GCGGATCGGGGATTGTCTTTCTTCAGCTCGCTGATGATATGCTGACGCT  
CAATGCCGTTTGGCCTCCGACTAACGAAAATCCCGCATTGACGGCT  
GATCCGATTGGCACGGCGGACGGCGAATGGCGGAGCAGACGCTCGTC  
CGGGGGCAATGAGATATGAAAAGCCTGAACTCACCGCGACGTATCGA  
TGTCGAGGTTTCTCAGGGGAGCCACCCAGAGAAGCCCTCGGAGCTG  
AGCGGAGCTATTTCAAAGCCATGCCAGCTAGAGACAGTGCACACCGC  
CAAGCATCTGCAAACCCTCGCCTGGAGGGAAAGTGCAATGTACGTAC  
GCTGGTTTCCCTCCAGAAAGGATTCTGCGGCTTCTCAACTTTGGAAGA  
AGAGGCGGAACGAACTGCTGTTTCAGCCTACTCATGTGAGGAGGCTGG  
TCCTTTACCCTGATGCCCCGAGGGCATCAGGGTAAAGGACCAGCCTCGC  
CAACTAGGAGCGCTACCAAGGCGAACACAACCCAGGACTTGGTAGAAC  
CCTTCGCCGGAGAAGTTCAGACTCATCGGCATGAGCACCCCTCGCCGC  
GCACTCGGCACCGGTCCGTGACCAACCAGGACGTCGTTGTGCGAC  
GTCGGCCCCGCGGCTCCTGCCCGCCGAACGCGTCGTCGTCGACGGCC  
TGGTGCTCATCGACGAGACCCGGAGCCAGGTGAAAAGCGCCGGCGG  
ACGCTCGGACTGGGCGCGGGATTCCAGCAGTAACCCAGGTCCGCCGG  
CCACCTCACGGCAGGCAGACCCTCGGCTTTCGCGCCGGGACCGCCAT  
GAGACCGCCACCCGGATGTCCGGGGTGGCGGTCTCATGGCGGTCCCT  
CAGCGGCCCTACGCGACCGCTGTGTGACGCGGAGGCAGTCTCCGGG  
GTGCTGGCCCCAGGGCTGGAGTACCGGGGCGAGCTTGCCTTGCAGC  
GGCGGCACACGGGCGACGCGGCGCCGGGCGGGGGAGTCTTGACGTC  
GACGGTGACCGGCTTCGGCTTCAGGCGCTTCCGAAGGCTGATCGTCG  
GGCGGATCGCCTCCTTCTTCGGCTGACGCACTCGGTGAGCGAAGCG  
GCCAGCTCCTCCGTGCGGGCCTCGTTGGCCTTCCGGCGCGCCTCGCG  
GAAAGCAGCTTCTCCTCGGACATGACCTCGAACCTCATCTGGTCAGC  
GTCAAGGTCGCCCGGCGCGGCCGGCGCTTCCGGGGCGGGCGGGTCC  
AGGACGTCCTTGCCCCACACCAGGCCCCAGGACTCGACGAGCCGCCG  
GACGCCCGGTAGGCCGTACGTCTCGGCGACCTTATGAGGTCGAGGC  
GACGTCCGGCGACGCGGGCGATGTATCGGTACCAGATGTAGGCCGGG  
ATGACCGCGATGGCGACCAGGCCCTCGGTGTCGTCGGTGATCTCCTCC  
TCGGTGGCGACGTCCTGCTGGATGCCGAGTTCTTATCAGCCGGTTC  
AGGTTCTGCGACCGGTAGTGCTTGCAGGACCTGGAACACGCCGAACCTCG  
CGCTCGCGGTAATTCTCGACGAACGGGCCGGGCCGACGAAGCCGCTG

CAGCTCGGCGGCCGCCGCGTCCGCCAGGTTCGAGCGGTCCCATGCGGT  
CGTCGCCGCGACCGGCCTTGAAGTTCTGTCCGGCCAGCTCCAGGCCG  
ATCTTGCGACGCCGCCCTTGGTCTTGTCCGGCTCCTTGTAGAGGTAG  
CGGGCCTGCTTGCCCGCATCGCCGTCAGCGGCGTCCGCGCCGTTGAG  
TGGGCGCACGTCCGTGCCGTGGCCCTTGCCCTCACAGGAGCAACCGG  
GCCGGTCGCACGTCTCGCTGACGGTGTAGCCGCCCGCGGATTCGACC  
CCGGCGGCCAGGCTCCGGCGAGTGCCTCGCGGAACGCGGCCTGGG  
CGTCCGGGCGGAGCACCTCGCGGGTGACCCAGAGCGTGTGCCAGTGC  
AGGTGCCAGCCGGAGCCCCAGCCGAAGGTGTCCTCGAAGGCCCGCTC  
GTAGCCGATGATCCCGAAGTCGTGCGGCATCGTGCGCCAGCGGGCGC  
CGGACGAGCCGTACGCGCCCTTCCAGCCGTCGTGCAAGACCGCGACC  
AGGCCGTGCCGATTCCCTTGCGGACGGTGCCGAACGCCATGCGCTC  
GAAGTGGCGCAACGTGTTCTGTGCCAAGGTGCAGCCCGTACCCGGCGT  
CCGCGAGACCGTCCGGCGGCGAGCTGCACGTTTCGAGCCCCGTACGGCC  
AGGATGCGGCTCATGCACCACGGGCAGGTGTGGACGTTGTTGCAGCG  
GCACGTGTTGCCCCACGTGCGCTCGCCCGGCTTCCACATCAGCTCGGC  
CGTCCCAGGTCAGTGCAGCCGGGTCCCAGCCCTTGAACGCCTCGTTCA  
GCGACACCGTCTGGTGCCTGGTCCGCGGCGCGCCGGGCGAACCCTCGTCCGCG  
GGTCTCCCGCCCGGCTGTGCGCGCACCCCTCGTTGGGGTAGAACC  
CGTTCAGTTACAGCGCTCTGACCTGCAGTGGACGGAGATTTCCCTTA  
CTACTAAAGCCCGCGTCCGGATTACCCGCTGTAGTCGTGCTTGCTACG  
CTGCGTGAAGTGGTCCGCAATGAGACGCTTTGCGCGCTTTCGGCAGGCG  
TCCGAGCAGTAGATTTGGGGCGCTTCCCGGGGATGTGGACGATCGGG  
GTGCCGAGTGGCACTTCGGTCCGGCGGGGCGCGGTGGTGTGACGCG  
GCTGTTCTCTCGTACGCTCGTCACAGAGCAAACGTCCTCACTCGGCATG  
CTGCGCCGGTTCGGGGGCGGCGAGCCCGGGAGGCCAATCCCGGGCT  
CGTGCCATTTCTGGGTCTGTTGATCCTGGCATTGGTGTGGCCGTTTCAT  
TGCCCCTGCTCGCTCCTGACGCGCCGATAGACGTCCGATACGCCCGGT  
GCTGGTGGGATTTGATAGGTCCGGAAGAAGCCCCGCCCGGGCCTGGGC  
GGGGCTTCTGTGCGTCAGGACCTCCTCGTCGTGAGCCTCTTCGGCCT  
ATGGACGGAGTGACCTCGTGATCCGTTACAGCCGCGCGCGCTCGCGTA  
GAGCGGTCTCATCAGTTCCACGAACGGTCTCTTCGCAGATCAGGGCG  
TTGGGGCGGAGTCTACCAAGGACTACGTCTGCTGGCGATTTCCGTTA  
CACCCCGGGCGGTGGCCGGCGCACACGCGCGCCCGCGTGGGCGAGT  
GCAGAAAGTGCAGAAACCTAGGCGCTGATGGTCCAGGTCCACGGTTCG  
TCGTCCGGCGGCGGCGGGCGGCGGCGTCCGCCAGGGCGCGGGCG  
AGACCGGCTACGGCGGGCTTGTGCGCCGGTTCGGGGCGACCTTGAG  
CAGCTAGTATGCAGGTGCAGGATCTTTCCGCTGCATAACCCTGCTTC  
GGGGTCATTATAGCGATTTTTTCGGTATATCCATCCTTTTTCGCACGATA  
TACAGGATTTTGCCAAAGGGTTCGTGTAGACTTTCCTTGGTGTATCCAA  
CGGCGTCAGCCGGGCAGGATAGGTGAAGTAGGCCACCCGCGAGCGG  
GTGTTCTTCTTCACTGTCCCTTATTCGCACCTGGCGGTGCTCAACGGG  
AATCCTGCTCTGCGAGGCTGGCCGGCTACCGCCGGCGTAACAGATGAG  
GGCAAGCGGATGGCTGATGAAACCAAGCCAACCAGGAAGGGCAGCCC  
ACCTATCAAGGTGTAAGTGCCTTCCAGACGAACGAAGAGCGATTGAGGA  
AAAGGCGGCGGCGGCGGCGGCGGCGGCGGCGGCGGCGGCGGCGGCGG  
TCGGCCAGGGCTACAAAATCACGGGCGTCCGTGGACTATGAGCACGTCC  
GCGAGCTGGACAGCGTGCAGGACTGGGGGAGTTA



**Supplementary table 3. Promoters used in this study.** Plasmid sequences can be constructed by replacing the yellow regions in the example plasmids shown above. Promoter sequences were derived from Bai et al.<sup>1</sup>, Myronovskiy and Luzhetskyy<sup>2</sup>, and Phelan et al<sup>3</sup>.

| Promoter ID | Sequence (5' to 3')                                                                                                                                                                                                                                                                                                                |
|-------------|------------------------------------------------------------------------------------------------------------------------------------------------------------------------------------------------------------------------------------------------------------------------------------------------------------------------------------|
| 57          | TTGAACGGCTGGAGGGATACACCTGGTCATAGGATAACCATC                                                                                                                                                                                                                                                                                         |
| ermE*p      | CTCTAGTATGCATGCGAGTGTCCGTTTCGAGTGGCGGCTTGCGCCCGATGCTAG<br>TCGCGGTTGATCGGCGATCGCAGGTGCACGCGGTTCGATCTTGACGGCTGGCG<br>AGAGGTGCGGGGAGGATCTGACCGACGCGGTCCACACGTGGCACCGCGATGC<br>TGTTGTGGGCACAATCGTGCCGGTTGGTAGGATCCACAT                                                                                                                 |
| gapdh(EL)   | GCTGTCCTTCGGTTCGGACGTGCGTCTACGGGCACCTTACCGCAGCCGTCGG<br>CTGTGCGACACGGACGGATCGGGCGAACTGGCCGATGCTGGGAGAAGCGCGC<br>TGCTGTACGGCGCGCACCGGGTTCGGAGCCCCTCGGCGAGCGGTGTGAACT<br>TCTGTGAATGGCCTGTTTCGGTTGCTTTTTTTATACGGCTGCCAGATAAGGCTTG<br>CAGCATCTGGGCGGCTACCGCTATGATCGGGGCGTTTCTGCAATCTTAGTGC<br>GAGTATCTGAAAGGGGATACGC                   |
| KasO*p      | TGTTACATTTCGAACGGTCTCTGCTTTGACAACATGCTGTGCGGTGTTGTAAAG<br>TCGTGGCC                                                                                                                                                                                                                                                                 |
| rpsl(XC)    | GCCCTGCAGGCGGAAGTCAGGTAGACACGACTTCCGCTAGTCCTTGCAAGGTC<br>TGCTGACGTGAGGCGGGGCGGTCGTTTTTGACCGCCCTGCCTTCGTCATGTAG<br>GCTCGCTCGCTGTGCCTGGCGTGTTCATCAGACGCCAGGTCCCGGTGCCGTG<br>AGGCCCGGGCCATCGAGCCGGTGGTACGTGGCTGCGGTCCCCTTGTGAGGGC<br>TGCGCGCCGTGTGCTGTCCGGCGCGCACAGCCTTGAATCCACCCGCGGGGGC<br>CGGCCGGTCTCCGTGAGCTCGAGTAGACGACGGAGACGTA |
| SP1         | TGTTACATTTCGAACCGTCTCTGCTTTGACATGGAGAGAAGTTTTGTAAAGTCG<br>TGGCCA                                                                                                                                                                                                                                                                   |
| SP10        | TGTTACATTTCGAACCGTCTCTGCTTTGACATGTTCTTACGGTCACATGTAAAGT<br>CGTGGCCA                                                                                                                                                                                                                                                                |
| SP20        | TGTTACATTTCGAACCGTCTCTGCTTTGACACATGACGCTCACCCGTTGTAAAG<br>TCGTGGCCA                                                                                                                                                                                                                                                                |
| SP30        | TGTTACATTTCGAACCGTCTCTGCTTTGACATCGTGTGGCGCTTGGGTGTAAAG<br>TCGTGGCCA                                                                                                                                                                                                                                                                |
| SP43        | TGTTACATTTCGAACCGTCTCTGCTTTGACACGGACAAGCGCTATGGTGTAAAG<br>TCGTGGCCA                                                                                                                                                                                                                                                                |

**Supplementary table 4. sgRNA sequences used in this study.** Plasmid sequences can be constructed by replacing the dark yellow regions in the example plasmids shown above.

| Sequence (5' to 3')          | PAM location | Strand | Target  | Type      | Tool    | Plasmid                                     |
|------------------------------|--------------|--------|---------|-----------|---------|---------------------------------------------|
| CATGTTG<br>TCCTCCT<br>CGCCCT | 11           | NT     | mCherry | On-target | CRISPRi | pJEC711,<br>pJEC712,<br>pJEC713,<br>pJEC714 |
| TCTGGGT<br>GCCCTCG<br>TACGGC | 123          | NT     | mCherry | On-target | CRISPRi | pJEC727                                     |
| GTCGGCC<br>GGGTGCT<br>TGACGT | 230          | NT     | mCherry | On-target | CRISPRi | pJEC728                                     |

|                                  |     |    |                                   |            |                     |                                             |
|----------------------------------|-----|----|-----------------------------------|------------|---------------------|---------------------------------------------|
| TCTTGAC<br>TTCGGCG<br>TCGTAG     | 531 | NT | mCherry                           | On-target  | CRISPRi             | pJEC729                                     |
| CGTG TAG<br>TCCTCGT<br>TGTGCG    | 623 | NT | mCherry                           | On-target  | CRISPRi             | pJEC730                                     |
| CAAGGGC<br>GAGGAG<br>GACAACA     | 29  | T  | mCherry                           | On-target  | CRISPRi             | pJEC731                                     |
| GGGGAG<br>GGCCGG<br>CCGTACG<br>A | 132 | T  | mCherry                           | On-target  | CRISPRi             | pJEC732                                     |
| GAAGGCC<br>TACGTCA<br>AGCACC     | 242 | T  | mCherry                           | On-target  | CRISPRi             | pJEC733                                     |
| CGAAGTC<br>AAGACGA<br>CGTACA     | 560 | T  | mCherry                           | On-target  | CRISPRi             | pJEC734                                     |
| CAACGAG<br>GACTACA<br>CGATCG     | 647 | T  | mCherry                           | On-target  | CRISPRi             | pJEC735                                     |
| GGCTCAG<br>GTGAAGA<br>GCGGGG     | NA  | NT | Non-coding<br>genomic<br>sequence | Off-target | CRISPRi,<br>CRISPRa | pJEC723,<br>pJEC737,<br>pJEC740,<br>pJEC743 |
| GCGTGC<br>GTCGCAC<br>CTCCGTG     | NA  | NT | Non-coding<br>genomic<br>sequence | Off-target | CRISPRi             | pJEC724                                     |
| TGCACTG<br>CTGTAAG<br>GACGAT     | NA  | NA | No match                          | Off-target | CRISPRi             | pJEC725                                     |
| CCGTGTG<br>GCCCGCT<br>CTTGTT     | 44  | NT | jadR2                             | On-target  | CRISPRi             | pJEC749                                     |
| AGGTATC<br>CTGCGGT<br>GTCCTG     | -82 | T  | mCherry                           | On-target  | CRISPRa             | pJEC739,<br>pJEC742,<br>pJEC745             |
| AGGACGC<br>CTTTGGT<br>AACCGC     | -83 | NT | mCherry                           | On-target  | CRISPRa             | pJEC738,<br>pJEC741,<br>pJEC744             |
| ATGTGAA<br>CAAAGGA<br>CGCCTT     | -73 | NT | mCherry                           | On-target  | CRISPRa             | pJEC747                                     |
| TGGTAAC<br>CGCAGGA<br>CACCGC     | -93 | NT | mCherry                           | On-target  | CRISPRa             | pJEC748                                     |
| CGTCAGA<br>ATTCACA<br>AGCCCG     | -73 | NT | jadJ                              | On-target  | CRISPRa             | pJEC750                                     |

**Supplementary table 5. Activator domains (ADs) used in this study.** Plasmid sequences can be constructed by replacing the dark green regions in the example plasmids shown above.

| AD   | Nucleotide sequence                                                                                                                                                                                                                                                                                                                                                                                                                                                                                                                                                                                                                                                                                                                                                                                               | Protein sequence                                                                                                                                                                                                                                                                            | Plasmids                                                            |
|------|-------------------------------------------------------------------------------------------------------------------------------------------------------------------------------------------------------------------------------------------------------------------------------------------------------------------------------------------------------------------------------------------------------------------------------------------------------------------------------------------------------------------------------------------------------------------------------------------------------------------------------------------------------------------------------------------------------------------------------------------------------------------------------------------------------------------|---------------------------------------------------------------------------------------------------------------------------------------------------------------------------------------------------------------------------------------------------------------------------------------------|---------------------------------------------------------------------|
| αNTD | ATGCTTATCGCTCAGCGTCCTTCGCTGA<br>CCGAAGAGGTCGTCGACGAGTTCCGCT<br>CCCGGTTTCGTGATCGAGCCGCTGGAGC<br>CGGGCTTCGGCTACACCCTCGGCAACTC<br>CCTCCGCCGTACCCTCCTCTCCTCGATC<br>CCGGGTGCCGCTGTCACCAGCATCCGC<br>ATCGACGGTGTCTGCACGAGTTCACCA<br>CCGTGCCGGGCGTCAAGGAGGACGTCA<br>CCGACCTCATCCTCAACATCAAGCAGCT<br>GGTCGTCTCCTCGGAGCACGACGAGCC<br>GGTCGTGATGTACCTGCGCAAGCAGGG<br>CCCGGGTCTGGTCACCGCCGCCGACAT<br>CGCGCCCCCGGCCGGTGTGAGGTGCA<br>CAACCCCGACCTCGTCCTCGCCACGCTC<br>AACGGCAAGGGCAAGCTGGAGATGGAG<br>CTGACCGTCGAGCGCGGTGCGGGCTAC<br>GTCTCCGCCGTGCAGAACAAGCAGGTC<br>GGTCAGGAGATCGGGCGCATCCCGGTC<br>GACTCGATCTACTCGCCGTTCTCAAGG<br>TCACCTACAAGGTCGAGGCGACCCGAGT<br>CGAGCAGCGCACCGACTTCGACAAGCT<br>GATCGTCGACGTGAGACCAAGCAGGC<br>CATGCGCCCCGCGTGACGCCATGGCGTC<br>CGCCGGCAAGACCCTGGTCGAGCTGTT<br>CGGTCTGGCGCGCGAGCTCAACATCGA<br>CGCC | MLIAQRPSLTEEVDE<br>FRSRFVIEPLEPGFY<br>TLGNSLRRTLLSSIPGA<br>AVTSIRIDGVLHEFTTV<br>PGVKEDVTDLILNIKQL<br>VVSSEHDEPVVMYLR<br>KQGPGLVTAADIAPPA<br>GVEVHNPDLVLATLNG<br>KGKLEMELTVERGRG<br>YVSAVQNKQVQGQEI<br>RIPVDSIYSPVLKVTYK<br>VEATRVEQRTDFDKLI<br>VDVETKQAMRPRDAM<br>ASAGKTLVELFGLARE<br>LNIDA | pJEC737,<br>pJEC738,<br>pJEC739,<br>pJEC747,<br>pJEC748,<br>pJEC750 |
| ω    | GTGTCCTCTTCCATCACCGCGCCCGAGG<br>GCATCATCAACCCGCGGATCGACGAGCT<br>GCTCGAGGCCACGGACTCGAAGTACAG<br>CCTCGTGATCTACGCGGCCAAGCGCGC<br>GCGTCAGATCAACGCGTACTACTCCCAG<br>CTCGGCGAGGGCCTGCTGGAGTACGTG<br>GGTCCGCTGGTCGACACCCACGTCCAC<br>GAGAAGCCGCTCTCGATCGCCCTGCGC<br>GAGATCAACGCGGGCCTGCTGACGTCC<br>GAGGCCATCGAGGGCCCGGCGCAG                                                                                                                                                                                                                                                                                                                                                                                                                                                                                                | VSSSITAPEGIINPPIDE<br>LLEATDSKYSLVYAAK<br>RARQINAYYSQLGEGE<br>LEYVGPLVDTHVHEKP<br>LSIALREINAGLLTSEAI<br>EGPAQ                                                                                                                                                                               | pJEC740,<br>pJEC741,<br>pJEC742                                     |
| RbpA | ATGAGTGAGCGAGCTCTTCGCGGCACG<br>CGCCTCGTGGTGACGAGCTACGAGACC<br>GACCGCGGCATCGATCTGGCCCCGCGC<br>CAGGCCGTGGAGTACGCATGCGAGAAG<br>GGCCATCGTTTTGAGATGCCCTTCTCGG<br>TGGAAGCGGAAATTCCGCCGGAGTGGG<br>AGTGCAAGGTCTGCGGAATCCAGGCACT<br>CCTGGTGGACGGGGACGGACCTGAGGA                                                                                                                                                                                                                                                                                                                                                                                                                                                                                                                                                            | MSERALRGTRLVVTSY<br>ETDRGIDLAPRQAVEY<br>ACEKGHRFEMPFSVE<br>AEIPPEWECKVCGIQA<br>LLVDGDGPEEKKGKP<br>ARTHWDMLMERRTRE<br>ELEEVLAEERLAVLRSG<br>AMNIAVHPRDSRKA                                                                                                                                    | pJEC743,<br>pJEC744,<br>pJEC745                                     |

|  |                                                                                                                                                                               |  |  |
|--|-------------------------------------------------------------------------------------------------------------------------------------------------------------------------------|--|--|
|  | GAAGAAGGGCAAGCCTGCGGTACGCA<br>CTGGGACATGCTCATGGAGCGACGCAC<br>CCGCGAGGAGCTGGAGGAGGTCCTCGC<br>CGAAAGGCTGGCCGTCCTGCGTTCCGG<br>CGCCATGAACATCGCCGTGCATCCGCG<br>CGACAGCCGCAAGTCCGCC |  |  |
|--|-------------------------------------------------------------------------------------------------------------------------------------------------------------------------------|--|--|

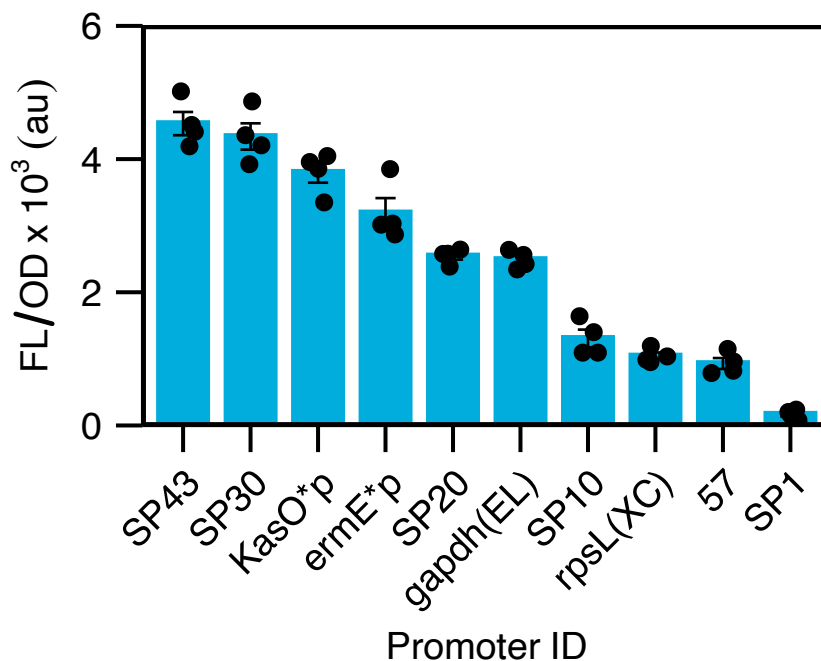

**Supplementary figure 1. Evaluating the strength of a library of *Streptomyces* promoters.** Fluorescence characterization of constitutive promoters. The expression strength of a constitutive promoter library was evaluated by cloning each promoter upstream of an mCherry reporter and integrating the resulting reporter constructs into the genome of *S. venezuelae* cells at the  $\Phi$ C31 attB site. Fluorescence characterization was performed by bulk fluorescence measurements (measured in units of fluorescence [FL]/optical density [OD] at 600 nm). Data represent mean values and errors bars represent standard deviation of 4 biological replicates.

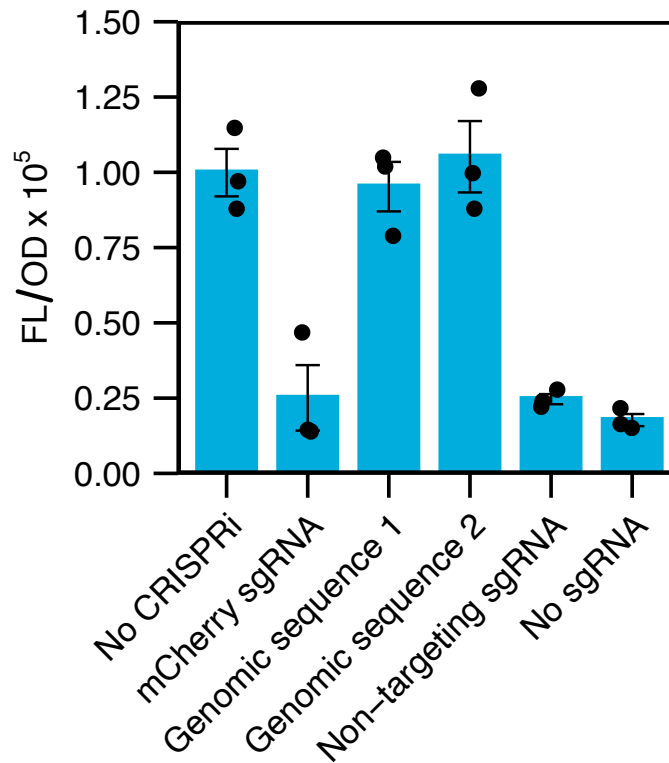

**Supplementary figure 2. CRISPRi results in decreased fluorescence in the absence of a sgRNA or in the presence of non-targeting sgRNA.** Fluorescence characterization of *S. venezuelae* cells containing a genomically-integrated mCherry gene conjugated with CRISPRi plasmids containing different sgRNAs or a no CRISPRi control plasmid. mCherry sgRNA binds to the mCherry gene and represses expression. Genomic sequence 1 and 2 are sgRNAs designed to non-coding sequences present in the *S. venezuelae* genome. Non-targeting sgRNA is designed to target a sequence absent in the *S. venezuelae* genome. No sgRNA is a CRISPRi plasmid without an sgRNA. Fluorescence characterization was performed by bulk fluorescence measurements (measured in units of fluorescence [FL]/optical density [OD] at 600 nm). Data represent mean values and errors bars represent standard deviation of at least 3 biological replicates.

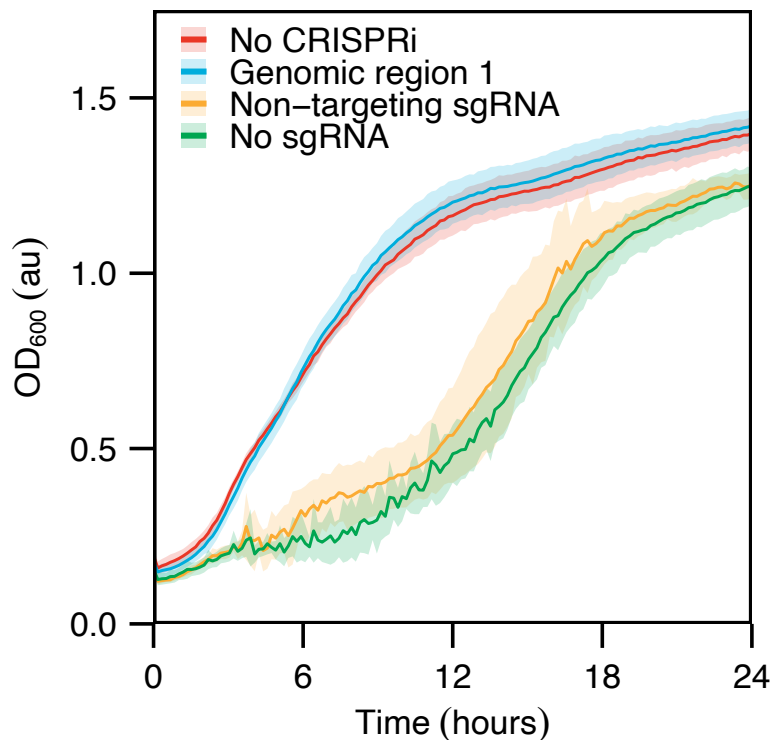

**Supplementary figure 3. CRISPRi results in inhibition of growth in the absence of a sgRNA or in the presence of non-targeting sgRNA.** Growth measurement of *S. venezuelae* conjugated with CRISPRi plasmids containing different sgRNAs or a no CRISPRi control plasmid. mCherry sgRNA binds to the mCherry gene and represses expression. Genomic region is a sgRNA designed to a non-coding sequence present in the *S. venezuelae* genome. Non-targeting sgRNA is designed to target a sequence absent in the *S. venezuelae* genome. No sgRNA is a CRISPRi plasmid without an sgRNA. Growth was evaluated by measuring optical density at 600 nm (OD<sub>600</sub>) every 10 minutes at 30 °C with 90 rpm shaking. Lines represent mean values over time and shaded area depicts standard deviation of 4 biological replicates.

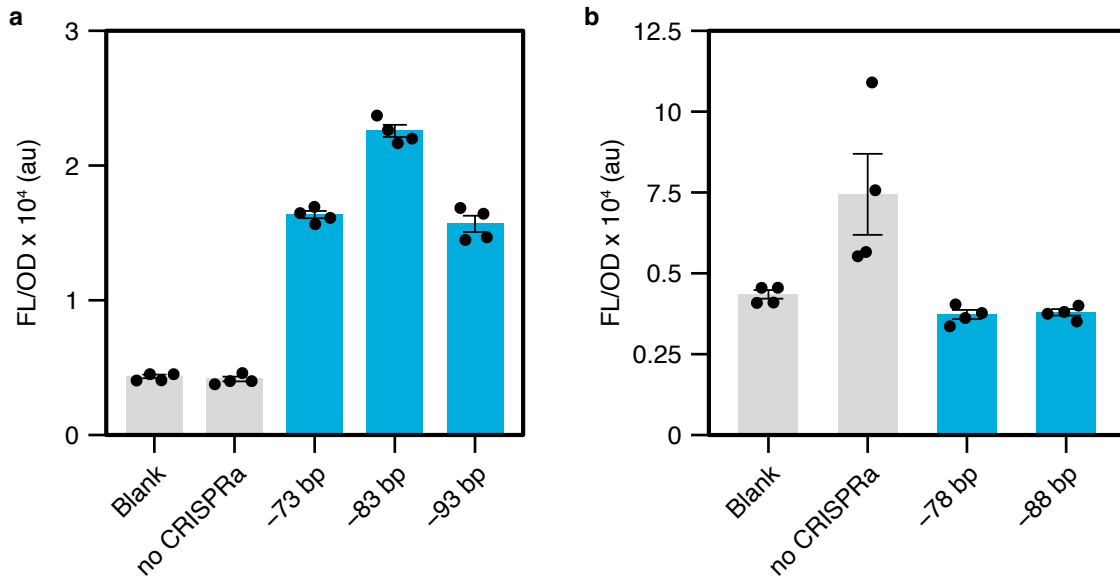

**Supplementary figure 4. Evaluating distance-dependent activation patterns of CRISPRa.** Fluorescence characterization of *S. venezuelae* cells containing a genomically-integrated mCherry gene conjugated with CRISPRa plasmids containing different sgRNAs or a no CRISPRa control plasmid. Blank cells are *S. venezuelae* cells lacking mCherry and transformed with the no CRISPRa plasmid that are used to determine autofluorescence. In (a) a reporter containing PAMs on the template strand at 73, 83, and 93 bp upstream of the reporter promoter's TSS is used. In (b) an additional 5 bp are added before the reporter promoter's TSS to create PAMs at 78 and 88 bp upstream. Fluorescence characterization was performed by bulk fluorescence measurements (measured in units of fluorescence [FL]/optical density [OD] at 600 nm). Data represent mean values and errors bars represent standard deviation of at least 4 biological replicates



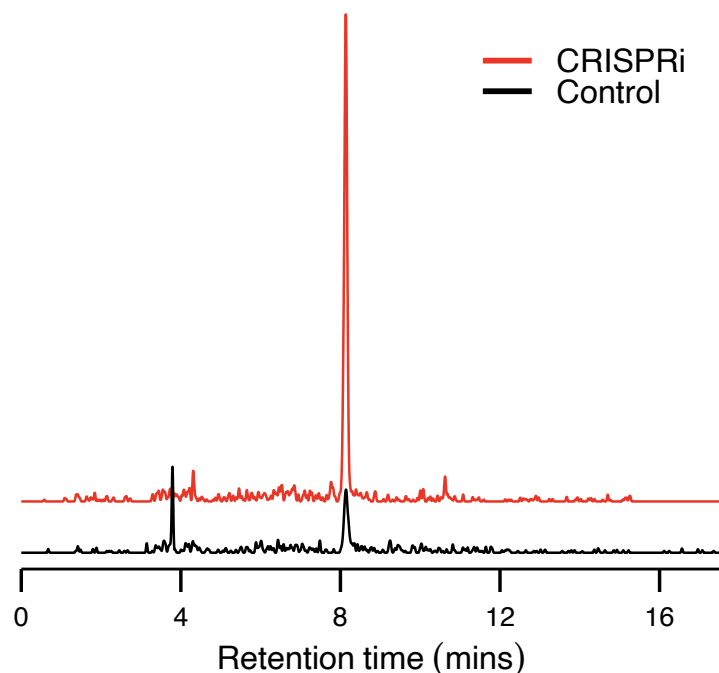

**Supplementary figure 5. Activating production of jadomycin B using CRISPRi.** LC-MS analysis of crude extracts of *S. venezuelae* cells conjugated with CRISPRi plasmids designed to repress the expression of *jadR2*. Cells were cultured, fermented, and extracted as described in methods. The crude extracts were then analyzed via liquid chromatography coupled to mass spectrometry (LC-MS). The reported data are extracted ion chromatogram at the corresponding *m/z* value of *jdB* ( $m/z = 550.2059$ ,  $[M+H]^+$ ). A *jdB* standard was run in parallel, and showed the same elution time as the CRISPRi sample. We note that the observed elution time of these replicates differs from the data shown in Figure 3c due to different instrumentation. For these samples, LC-MS analysis was carried out using a Shimadzu IT-ToF MS system interfaced to a Shimadzu LC-20 ADXR LC system through an Electro Sprat Ionization (ESI) source. Separations were carried out using an Ascentis Express C18 column (1.0 mm ID x 150 mm with 90A, 2.7 $\mu$  particles). The LC was operated at a flow rate of 0.175 mL/min with mobile phase A (0.1% Formic Acid in Water) and B (0.1% Formic Acid in Acetonitrile). The Analytical separation was carried out over 10 min; going from 10%B ( $t = 0$  min) to 95% B ( $t = 10$  min).

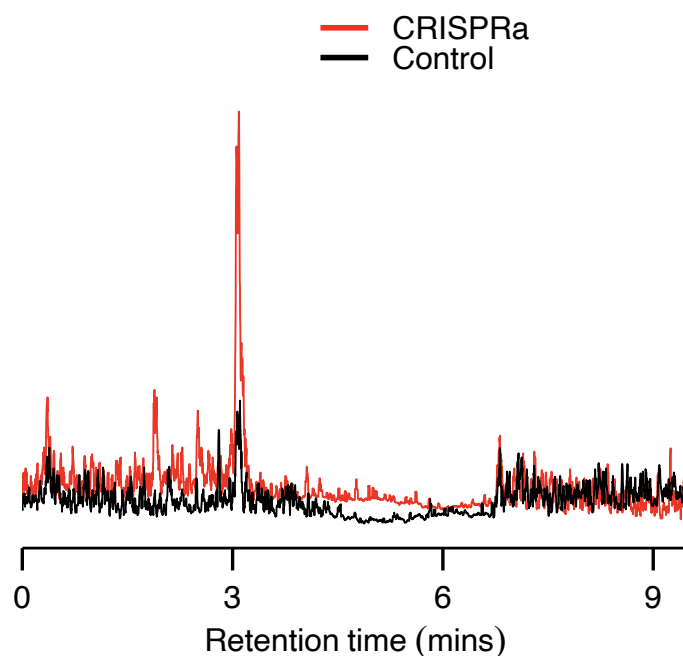

**Supplementary figure 6. Activating production of jadomycin B using CRISPRa.** LC-MS analysis of crude extracts of strains harboring jadJ-V-targeting CRISPRa plasmids. To induce the production of jdB, a sgRNA was designed to target a sequence downstream of a PAM site at 73 bp from the TSS of the jadJ-V operon within the jdB BGC. The sgRNA was cloned into a plasmid harboring the  $\alpha$ NTD-based CRISPRa system. The plasmid was conjugated into wild-type *S. venezuelae*, and the resulting strains were cultured, fermented, and extracted. The crude extracts were then analyzed via liquid chromatography coupled to mass spectrometry (LC-MS), as described in the methods. The reported data are extracted ion chromatogram at the corresponding  $m/z$  value of jdB ( $m/z = 550.2059$ ,  $[M+H]^+$ ) for a second set of representative biological replicates (other than the ones shown in Figure 3d). A jdB standard was run in parallel, and showed the same elution time as the CRISPRa sample.

## REFERENCES

1. Bai, C. *et al.* Exploiting a precise design of universal synthetic modular regulatory elements to unlock the microbial natural products in *Streptomyces*. *Proc. Natl. Acad. Sci.* **112**, 12181–12186 (2015).
2. Myronovskyi, M. & Luzhetskyy, A. Native and engineered promoters in natural product discovery. *Nat. Prod. Rep.* **33**, 1006–1019 (2016).
3. Phelan, R. M. *et al.* Development of next generation synthetic biology tools for use in *streptomyces venezuelae*. *ACS Synth. Biol.* **6**, 159–166 (2017).
